# Supplementary material
Source: PubMed Central journal article supplement (PMC9575390)

## Supplemental Material\*

Ioannou GN, Bohnert ASB, O'Hare AM, et al. Effectiveness of mRNA COVID-19 vaccine boosters against infection, hospitalization, and death: a target trial emulation in the Omicron (B.1.1.529) variant era. *Ann Intern Med.* 11 October 2022. [Epub ahead of print]. doi:10.7326/M22-1856

### Contents

|                                                                                                                                                                                                                                                                                                                                                                                 |    |
|---------------------------------------------------------------------------------------------------------------------------------------------------------------------------------------------------------------------------------------------------------------------------------------------------------------------------------------------------------------------------------|----|
| Supplement Table 1. Specification and emulation of a target trial evaluating the effectiveness of booster (i.e. third dose) mRNA COVID-19 vaccination conducted from December 1, 2021 to March 31, 2022 .....                                                                                                                                                                   | 2  |
| Supplement Table 2. Immunosuppressive and cancer medications. ....                                                                                                                                                                                                                                                                                                              | 4  |
| Supplement Table 3: ICD10 Codes used to define diabetes, congestive heart failure (CHF), chronic obstructive pulmonary disease (COPD) and chronic kidney disease (CKD).....                                                                                                                                                                                                     | 7  |
| Supplement Table 4. Baseline sociodemographic and clinical characteristics of persons who received a booster dose of mRNA COVID-19 vaccination in the VA healthcare system and their unmatched counterparts who did not receive a booster dose from December 1, 2021 to March 31, 2022. ....                                                                                    | 24 |
| Supplement Table 5. Baseline sociodemographic and clinical characteristics of persons who received a booster dose of mRNA COVID-19 vaccination in the VA healthcare system and their matched counterparts who did not receive a booster dose from December 1, 2021 to March 31, 2022, and for whom all members of matched sets were still at risk 10 days after time zero. .... | 27 |
| Supplement Figure 1. Schematic representation of the method used to match person(s) who did not receive a booster mRNA vaccine to each person who received a booster mRNA vaccine, within each 1-week period during the target trial period.....                                                                                                                                | 30 |
| Supplement Figure 2. Eligibility criteria and matching process resulting in the selection of study populations for the emulation of a target trial comparing the effectiveness of booster mRNA COVID-19 vaccination versus no booster in the national Veterans Affairs (VA) healthcare system from December 1, 2021 to March 31, 2022 .....                                     | 31 |
| Supplement Figure 3. Comparison of baseline characteristics of persons who received a 3 <sup>rd</sup> dose mRNA COVID-19 vaccine and their comparators who did not, before and after matching, demonstrate excellent balance after matching .....                                                                                                                               | 32 |

\* This supplemental material was provided by the authors to give readers further details on their article. The material was not copyedited.

Supplement Table 1. Specification and emulation of a target trial evaluating the effectiveness of booster (i.e. third dose) mRNA COVID-19 vaccination conducted from December 1, 2021 to March 31, 2022

| TARGET TRIAL SPECIFICATION                                                                                                                             | TARGET TRIAL EMULATION                                                                                                                                                                                                                                                                                                                                                                                                                                                                                                                                                                                                                                                                                                                                                                                                                                                                                                                                                                                                                                                                                                      |
|--------------------------------------------------------------------------------------------------------------------------------------------------------|-----------------------------------------------------------------------------------------------------------------------------------------------------------------------------------------------------------------------------------------------------------------------------------------------------------------------------------------------------------------------------------------------------------------------------------------------------------------------------------------------------------------------------------------------------------------------------------------------------------------------------------------------------------------------------------------------------------------------------------------------------------------------------------------------------------------------------------------------------------------------------------------------------------------------------------------------------------------------------------------------------------------------------------------------------------------------------------------------------------------------------|
| <b>ELIGIBILITY CRITERIA</b>                                                                                                                            |                                                                                                                                                                                                                                                                                                                                                                                                                                                                                                                                                                                                                                                                                                                                                                                                                                                                                                                                                                                                                                                                                                                             |
| VA enrollees age $\geq 18$ years                                                                                                                       | Same                                                                                                                                                                                                                                                                                                                                                                                                                                                                                                                                                                                                                                                                                                                                                                                                                                                                                                                                                                                                                                                                                                                        |
| Received two doses of mRNA COVID-19 vaccination at least 5 months before enrollment                                                                    | Same                                                                                                                                                                                                                                                                                                                                                                                                                                                                                                                                                                                                                                                                                                                                                                                                                                                                                                                                                                                                                                                                                                                        |
| No prior known infection with SARS-CoV-2 documented in VA (or Medicare) records                                                                        |                                                                                                                                                                                                                                                                                                                                                                                                                                                                                                                                                                                                                                                                                                                                                                                                                                                                                                                                                                                                                                                                                                                             |
| Known residential address                                                                                                                              | Same                                                                                                                                                                                                                                                                                                                                                                                                                                                                                                                                                                                                                                                                                                                                                                                                                                                                                                                                                                                                                                                                                                                        |
| User of VA healthcare system, defined as having any outpatient or inpatient encounter in the VA healthcare system in the preceding 24 months           | Same                                                                                                                                                                                                                                                                                                                                                                                                                                                                                                                                                                                                                                                                                                                                                                                                                                                                                                                                                                                                                                                                                                                        |
| Having a documented primary care physician (PCP) visit in the preceding 24 months                                                                      | Same                                                                                                                                                                                                                                                                                                                                                                                                                                                                                                                                                                                                                                                                                                                                                                                                                                                                                                                                                                                                                                                                                                                        |
| <b>TREATMENT STRATEGIES</b>                                                                                                                            |                                                                                                                                                                                                                                                                                                                                                                                                                                                                                                                                                                                                                                                                                                                                                                                                                                                                                                                                                                                                                                                                                                                             |
| Received 3 <sup>rd</sup> dose mRNA vaccination between December 1, 2021 and March 31, 2022 versus no 3 <sup>rd</sup> dose                              | Same.                                                                                                                                                                                                                                                                                                                                                                                                                                                                                                                                                                                                                                                                                                                                                                                                                                                                                                                                                                                                                                                                                                                       |
| <b>TREATMENT ASSIGNMENT</b>                                                                                                                            |                                                                                                                                                                                                                                                                                                                                                                                                                                                                                                                                                                                                                                                                                                                                                                                                                                                                                                                                                                                                                                                                                                                             |
| <p><b>Randomization:</b><br/>Eligible persons are randomly assigned to 3<sup>rd</sup> dose versus no 3<sup>rd</sup> dose mRNA COVID-19 vaccination</p> | <p><b>Sequential matching:</b><br/>A two-step matching process was used to emulate the balance in baseline characteristics achieved by randomization. Eligible persons were matched on the date of their booster dose to their comparator(s) who did not receive a booster dose as of that date by:</p> <ol style="list-style-type: none"> <li>a. Exact-matching on the following characteristics <ul style="list-style-type: none"> <li>• VA region or “VISN” (19 regions throughout USA)</li> <li>• Age (6-year buckets)</li> <li>• Charlson comorbidity index (3-point buckets)</li> <li>• Primary COVID-19 vaccination type ((BNT162b2 or mRNA-1273)</li> <li>• Time since completion of primary vaccination (6-week buckets)</li> </ul> </li> <li>b. Propensity score matching</li> </ol> <p>After exact-matching, we executed <b>propensity score matching</b> to identify the best match for each booster dose recipient. We used matching with replacement in a 1:k variable ratio, where k varied based on the number of propensity score ties. We included all ties to avoid imbalance due to random pruning.</p> |

|                                                                                                                                                                                                                                                                                                                                                   |                                                                                                                                                                                                                                                                                                                                                                                                                                                               |
|---------------------------------------------------------------------------------------------------------------------------------------------------------------------------------------------------------------------------------------------------------------------------------------------------------------------------------------------------|---------------------------------------------------------------------------------------------------------------------------------------------------------------------------------------------------------------------------------------------------------------------------------------------------------------------------------------------------------------------------------------------------------------------------------------------------------------|
|                                                                                                                                                                                                                                                                                                                                                   | <p>Characteristics included in the propensity score logistic regression model were:</p> <p>Age<br/>Sex<br/>Race<br/>Ethnicity<br/>Urban/rural residence<br/>Charlson Comorbidity Index (CCI)<br/>Body mass index<br/>Diabetes<br/>Congestive heart failure (CHF)<br/>Chronic obstructive pulmonary disease (COPD)<br/>Chronic kidney disease (CKD)<br/>Receipt of immunosuppressant medications in the 2 years prior<br/>Care Assessment Need (CAN) score</p> |
| <b>OUTCOMES</b>                                                                                                                                                                                                                                                                                                                                   |                                                                                                                                                                                                                                                                                                                                                                                                                                                               |
| <p>Laboratory-confirmed SARS CoV-2 Infection, documented by a nucleic acid amplification test (NAAT) or antigen test<br/>SARS-CoV-2-related hospitalization: any hospitalization on or within 30 days following SARS-CoV-2 infection<br/>SARS-CoV-2-related death: death due to any cause on or within 30 days following SARS-CoV-2 infection</p> | Same as for target trial                                                                                                                                                                                                                                                                                                                                                                                                                                      |
| <b>FOLLOW-UP</b>                                                                                                                                                                                                                                                                                                                                  |                                                                                                                                                                                                                                                                                                                                                                                                                                                               |
| <p>Follow-up starts on the date of randomization to either 3<sup>rd</sup> dose vaccination or no 3<sup>rd</sup> dose vaccination (“time zero”). Analysis is limited to individuals still at risk 10 days after randomization since there is no expectation of protective effect within the first 10 days after vaccination</p>                    | <p>Follow-up starts on the date of 3<sup>rd</sup> dose vaccination or the equivalent index date for the comparator who did not receive 3<sup>rd</sup> dose vaccination (“time zero”).<br/>Analysis is limited to matched sets in which all individuals are still at risk 10 days after time zero since there is no expectation of protective effect within the first 10 days after vaccination</p>                                                            |
| <b>CAUSAL CONTRASTS</b>                                                                                                                                                                                                                                                                                                                           |                                                                                                                                                                                                                                                                                                                                                                                                                                                               |
| Intention-to-treat effect                                                                                                                                                                                                                                                                                                                         | Observational analogue of the per-protocol effect                                                                                                                                                                                                                                                                                                                                                                                                             |
| Per-protocol effect, i.e. the effect if all individuals had received their assigned treatment                                                                                                                                                                                                                                                     |                                                                                                                                                                                                                                                                                                                                                                                                                                                               |
| <b>STATISTICAL ANALYSIS</b>                                                                                                                                                                                                                                                                                                                       |                                                                                                                                                                                                                                                                                                                                                                                                                                                               |
| <p>Hazard ratios, adjusted hazard ratios for each of the outcomes.<br/>Vaccine effectiveness was estimated as (1-adjusted hazard ratio)</p>                                                                                                                                                                                                       | Same as for target trial                                                                                                                                                                                                                                                                                                                                                                                                                                      |

**Supplement Table 2. Immunosuppressive and cancer medications.**

We identified prescription of these medications within the 2-year period prior to the study period as evidence of being on potentially immune suppressive medications

| Drug class                              | Drugs                                                                                                                                                                                     |
|-----------------------------------------|-------------------------------------------------------------------------------------------------------------------------------------------------------------------------------------------|
| Alkylating agents                       | bendamustine, busulfan, chlorambucil, cisplatin, cyclophosphamide, ifosfamide, lurbinectedin, melphalan, nitrogen mustard procarbazine, temozolomide                                      |
| Anti-CD19/CD3                           | blinatumomab                                                                                                                                                                              |
| Anti-HER2                               | trastuzumab                                                                                                                                                                               |
| Antimetabolites                         | azathioprine, capecitabine, cladribine, cytarabine, fludarabine, floxuridine, fluorouracil, gemcitabine, mercaptopurine, methotrexate, pemetrexed, pentostatin, pralatrexate, thioguanine |
| Antitumor antibiotics                   | bleomycin, dacarbazine, dactinomycin, daunorubicin, doxorubicin, epirubidin, idarubicin, mitomycin, mitoxantrone                                                                          |
| B-cell depletion and inhibition         | belimumab, ibriumomab, tiuxetan, obinutuzumab, ocrelizumab, <sup>b</sup> ofatumumab, <sup>b</sup> rituximab <sup>b</sup>                                                                  |
| BCL2 inhibitors                         | venetoxlax                                                                                                                                                                                |
| Interferon                              | interferon alpha-2a, interferon alpha-2b, interferon beta-1a, interferon beta-1b, interferon gamma, interferon gamma-1b                                                                   |
| BCR-ABL tyrosine kinase inhibitors      | bosutinib, dasatinib, imatinib, nilotinib, ponatinib                                                                                                                                      |
| Bruton tyrosine kinase (BTK) inhibitors | acalabrutinib, ibrutinib, zanubrutinib                                                                                                                                                    |
| Calcineurin inhibitors                  | cyclosporine, pimecrolimus, tacrolimus, voclosporin                                                                                                                                       |
| Complement inhibitor                    | eculizumab                                                                                                                                                                                |
| EGFR inhibitors                         | afatinib, cetuximab, dacomitinib, erlotinib, gefitinib, lapatinib, mobocertinib, necitumumab, osimertinib, panitumumab                                                                    |
| Glucocorticoids (systemic)              | cortisone acetate, betamethasone, budesonide, dexamethasone, hydrocortisone, methylprednisolone, prednisolone, prednisone                                                                 |
| Histone deacetylase inhibitors          | belinostat, vorinostat                                                                                                                                                                    |

|                                            |                                                                                                                           |
|--------------------------------------------|---------------------------------------------------------------------------------------------------------------------------|
| IL-1 inhibitors                            | anakinra, canakinumab, rilonacept                                                                                         |
| IL-12/23 inhibitors                        | guselkumab, ustekinumab                                                                                                   |
| IL-17 inhibitors                           | brodalumab, ixekizumab, secukinumab                                                                                       |
| IL-4/13 inhibitors                         | dupilumab                                                                                                                 |
| IL-5 inhibitors                            | benralizumab, mepolizumab, reslizumab                                                                                     |
| IL-6 inhibitors                            | sarilumab, siltuximab, tocilizumab                                                                                        |
| Immune checkpoint inhibitors (anti-CTLA-4) | ipilimumab                                                                                                                |
| Immune checkpoint inhibitors (anti-PD-1)   | cemiplimab, dostarlimab, nivolumab, pembrolizumab                                                                         |
| Immune checkpoint inhibitors (anti-PD-L1)  | atezolizumab, avelumab, durvalumab                                                                                        |
| Immune globulin                            | anti-thymocyte globulin <sup>b</sup>                                                                                      |
| Immunosuppressant agent                    | mycophenolate mofetil (MMF), mycophenolate sodium                                                                         |
| Janus kinase (JAK) inhibitors              | baricitinib, ruxolitinib, tofacitinib, upadacitinib                                                                       |
| Miscellaneous antineoplastics              | arsenic trioxide, blinhydroxyurea, idelalisib, olaparib, omacetaxine, palbociclib, pegaspargase, thalidomide, trabectedin |
| Miscellaneous biological                   | glatiramer acetate                                                                                                        |
| Miscellaneous other                        | leflunomide, sulfasalazine                                                                                                |
| mTOR kinase inhibitors                     | everolimus, sirolimus, temsirolimus                                                                                       |
| Nitrosoureas                               | carmustine, lomustine, streptozocin                                                                                       |
| Platinum derivatives                       | carboplatin, oxaliplatin                                                                                                  |
| Proteasome inhibitors                      | bortezomib, carfilzomib                                                                                                   |
| Selective adhesion-molecule inhibitors     | natalizumab, vedolizumab                                                                                                  |
| T-cell costimulation inhibitors            | abatacept, belatacept, alemtuzumab, <sup>2</sup> basiliximab                                                              |
| Thalidomide analogs                        | lenalidomide, pomalidomide                                                                                                |
| TNF inhibitors                             | adalimumab, certolizumab, etanercept, golimumab, infliximab                                                               |
| Topoisomerase inhibitors                   | irinotecan, mitoxantrone, topotecan                                                                                       |
| Tubulin-acting agents                      | eribulin, etoposide, ixabepilone                                                                                          |
| Tubulin-acting agents (taxanes)            | cabazitaxel, docetaxel, nabpaclitaxel, paclitaxel                                                                         |
| Tubulin-acting agents (vinca alkaloids)    | vinblastine, vincristine, vinorelbine                                                                                     |

|                                 |                                                                                                                      |
|---------------------------------|----------------------------------------------------------------------------------------------------------------------|
| VEGF tyrosine kinase inhibitors | afibercept, axitinib, bevacizumab, lenvatinib, pazopanib, ramucirumab, regorafenib, sorafenib, sunitinib, vandetanib |
|---------------------------------|----------------------------------------------------------------------------------------------------------------------|

**Supplement Table 3: ICD10 Codes used to define diabetes, congestive heart failure (CHF), chronic obstructive pulmonary disease (COPD) and chronic kidney disease (CKD).**

The presence of these conditions was defined by documentation of one or more of these ICD10 codes recorded in VA electronic health records (both outpatient or inpatient records) during the 2-year period prior to the date of vaccination. We used lists of ICD10 codes developed by the VA’s Centralized Interactive Phenomics Resource or CIPHER to define each condition. CIPHER develops and validates EHR-based phenotype algorithms and definitions.

CIPHER is available through VA intranet at:

[https://vhacdwdwhweb100.vha.med.va.gov/phenotype/index.php/VA\\_Phenomics\\_Library\\_-\\_Centralized\\_Interactive\\_Phenomics\\_Resource\\_\(CIPHER\)](https://vhacdwdwhweb100.vha.med.va.gov/phenotype/index.php/VA_Phenomics_Library_-_Centralized_Interactive_Phenomics_Resource_(CIPHER))

| Phenotype                                                    | Code   | CodeDescription                                                                                                                                                 |
|--------------------------------------------------------------|--------|-----------------------------------------------------------------------------------------------------------------------------------------------------------------|
| <b>CONGESTIVE HEART FAILURE (CHF)</b>                        |        |                                                                                                                                                                 |
| CHF                                                          | I50.20 | Unspecified systolic (congestive) heart failure                                                                                                                 |
| CHF                                                          | I50.21 | Acute systolic (congestive) heart failure                                                                                                                       |
| CHF                                                          | I50.22 | Chronic systolic (congestive) heart failure                                                                                                                     |
| CHF                                                          | I50.23 | Acute on chronic systolic (congestive) heart failure                                                                                                            |
| CHF                                                          | I50.30 | Unspecified diastolic (congestive) heart failure                                                                                                                |
| CHF                                                          | I50.31 | Acute diastolic (congestive) heart failure                                                                                                                      |
| CHF                                                          | I50.32 | Chronic diastolic (congestive) heart failure                                                                                                                    |
| CHF                                                          | I50.33 | Acute on chronic diastolic (congestive) heart failure                                                                                                           |
| CHF                                                          | I50.40 | Unspecified combined systolic (congestive) and diastolic (congestive) heart failure                                                                             |
| CHF                                                          | I50.41 | Acute combined systolic (congestive) and diastolic (congestive) heart failure                                                                                   |
| <b>CHRONIC KIDNEY DISEASE (CKD) AND KIDNEY FAILURE (CKF)</b> |        |                                                                                                                                                                 |
| CKD                                                          | 585.9  | CHRONIC KIDNEY DISEASE, UNSPECIFIED                                                                                                                             |
| CKD                                                          | D63.1  | Anemia in chronic kidney disease                                                                                                                                |
| CKD                                                          | E08.22 | Diabetes mellitus due to underlying condition with diabetic chronic kidney disease                                                                              |
| CKD                                                          | E09.22 | Drug or chemical induced diabetes mellitus with diabetic chronic kidney disease                                                                                 |
| CKD                                                          | E10.22 | Type 1 diabetes mellitus with diabetic chronic kidney disease                                                                                                   |
| CKD                                                          | E11.22 | Type 2 diabetes mellitus with diabetic chronic kidney disease                                                                                                   |
| CKD                                                          | E13.22 | Other specified diabetes mellitus with diabetic chronic kidney disease                                                                                          |
| CKD                                                          | I12.0  | Hypertensive chronic kidney disease with stage 5 chronic kidney disease or end stage renal disease                                                              |
| CKD                                                          | I12.9  | Hypertensive chronic kidney disease with stage 1 through stage 4 chronic kidney disease, or unspecified chronic kidney disease                                  |
| CKD                                                          | I13.0  | Hypertensive heart and chronic kidney disease with heart failure and stage 1 through stage 4 chronic kidney disease, or unspecified chronic kidney disease      |
| CKD                                                          | I13.10 | Hypertensive heart and chronic kidney disease without heart failure, with stage 1 through stage 4 chronic kidney disease, or unspecified chronic kidney disease |
| CKD                                                          | I13.11 | Hypertensive heart and chronic kidney disease without heart failure, with stage 5 chronic kidney disease, or end stage renal disease                            |
| CKD                                                          | I13.2  | Hypertensive heart and chronic kidney disease with heart failure and with stage 5 chronic kidney disease, or end stage renal disease                            |
| CKD                                                          | N18.1  | Chronic kidney disease, stage 1                                                                                                                                 |
| CKD                                                          | N18.2  | Chronic kidney disease, stage 2 (mild)                                                                                                                          |
| CKD                                                          | N18.3  | Chronic kidney disease, stage 3 (moderate)                                                                                                                      |
| CKD                                                          | N18.30 | Chronic kidney disease, stage 3 unspecified                                                                                                                     |

|                                                     |        |                                                                                                                                      |
|-----------------------------------------------------|--------|--------------------------------------------------------------------------------------------------------------------------------------|
| CKD                                                 | N18.31 | Chronic kidney disease, stage 3a                                                                                                     |
| CKD                                                 | N18.32 | Chronic kidney disease, stage 3b                                                                                                     |
| CKD                                                 | N18.4  | Chronic kidney disease, stage 4 (severe)                                                                                             |
| CKD                                                 | N18.5  | Chronic kidney disease, stage 5                                                                                                      |
| CKD                                                 | N18.6  | End stage renal disease                                                                                                              |
| CKD                                                 | N18.9  | Chronic kidney disease, unspecified                                                                                                  |
| CKD                                                 | R88.0  | Cloudy (hemodialysis) (peritoneal) dialysis effluent                                                                                 |
| CKD                                                 | Z49.01 | Encounter for fitting and adjustment of extracorporeal dialysis catheter                                                             |
| CKD                                                 | Z49.02 | Encounter for fitting and adjustment of peritoneal dialysis catheter                                                                 |
| CKD                                                 | Z49.31 | Encounter for adequacy testing for hemodialysis                                                                                      |
| CKD                                                 | Z49.32 | Encounter for adequacy testing for peritoneal dialysis                                                                               |
| CKF                                                 | I12.0  | Hypertensive chronic kidney disease with stage 5 chronic kidney disease or end stage renal disease                                   |
| CKF                                                 | I13.11 | Hypertensive heart and chronic kidney disease without heart failure, with stage 5 chronic kidney disease, or end stage renal disease |
| CKF                                                 | I13.2  | Hypertensive heart and chronic kidney disease with heart failure and with stage 5 chronic kidney disease, or end stage renal disease |
| CKF                                                 | N18.6  | End stage renal disease                                                                                                              |
| CKF                                                 | N99.0  | Postprocedural (acute) (chronic) kidney failure                                                                                      |
| <b>CHRONIC OBSTRUCTIVE PULMONARY DISEASE (COPD)</b> |        |                                                                                                                                      |
| COPD                                                | J40.   | Bronchitis, not specified as acute or chronic                                                                                        |
| COPD                                                | J41.0  | Simple chronic bronchitis                                                                                                            |
| COPD                                                | J41.1  | Mucopurulent chronic bronchitis                                                                                                      |
| COPD                                                | J41.8  | Mixed simple and mucopurulent chronic bronchitis                                                                                     |
| COPD                                                | J42.   | Unspecified chronic bronchitis                                                                                                       |
| COPD                                                | J43.0  | Unilateral pulmonary emphysema [MacLeod's syndrome]                                                                                  |
| COPD                                                | J43.1  | Panlobular emphysema                                                                                                                 |
| COPD                                                | J43.2  | Centrilobular emphysema                                                                                                              |
| COPD                                                | J43.8  | Other emphysema                                                                                                                      |
| COPD                                                | J43.9  | Emphysema, unspecified                                                                                                               |
| COPD                                                | J44.0  | Chronic obstructive pulmonary disease with (acute) lower respiratory infection                                                       |
| COPD                                                | J44.1  | Chronic obstructive pulmonary disease with (acute) exacerbation                                                                      |
| COPD                                                | J44.9  | Chronic obstructive pulmonary disease, unspecified                                                                                   |
| COPD                                                | J47.0  | Bronchiectasis with acute lower respiratory infection                                                                                |
| COPD                                                | J47.1  | Bronchiectasis with (acute) exacerbation                                                                                             |
| COPD                                                | J47.9  | Bronchiectasis, uncomplicated                                                                                                        |
| <b>DIABETES</b>                                     |        |                                                                                                                                      |
| DiabetesAny                                         | 250.00 | DIABETES MELLITUS WITHOUT MENTION OF COMPLICATION, TYPE II OR UNSPECIFIED TYPE, NOT STATED AS UNCONTROLLED                           |
| DiabetesAny                                         | 250.60 | DIABETES WITH NEUROLOGICAL MANIFESTATIONS, TYPE II OR UNSPECIFIED TYPE, NOT STATED AS UNCONTROLLED                                   |
| DiabetesAny                                         | E08.00 | Diabetes mellitus due to underlying condition with hyperosmolarity without nonketotic hyperglycemic-hyperosmolar coma (NKHHC)        |
| DiabetesAny                                         | E08.01 | Diabetes mellitus due to underlying condition with hyperosmolarity with coma                                                         |
| DiabetesAny                                         | E08.10 | Diabetes mellitus due to underlying condition with ketoacidosis without coma                                                         |
| DiabetesAny                                         | E08.11 | Diabetes mellitus due to underlying condition with ketoacidosis with coma                                                            |
| DiabetesAny                                         | E08.21 | Diabetes mellitus due to underlying condition with diabetic nephropathy                                                              |



|             |          |                                                                                                                                          |
|-------------|----------|------------------------------------------------------------------------------------------------------------------------------------------|
| DiabetesAny | E08.22   | Diabetes mellitus due to underlying condition with diabetic chronic kidney disease                                                       |
| DiabetesAny | E08.29   | Diabetes mellitus due to underlying condition with other diabetic kidney complication                                                    |
| DiabetesAny | E08.311  | Diabetes mellitus due to underlying condition with unspecified diabetic retinopathy with macular edema                                   |
| DiabetesAny | E08.319  | Diabetes mellitus due to underlying condition with unspecified diabetic retinopathy without macular edema                                |
| DiabetesAny | E08.3211 | Diabetes mellitus due to underlying condition with mild nonproliferative diabetic retinopathy with macular edema, right eye              |
| DiabetesAny | E08.3212 | Diabetes mellitus due to underlying condition with mild nonproliferative diabetic retinopathy with macular edema, left eye               |
| DiabetesAny | E08.3213 | Diabetes mellitus due to underlying condition with mild nonproliferative diabetic retinopathy with macular edema, bilateral              |
| DiabetesAny | E08.3219 | Diabetes mellitus due to underlying condition with mild nonproliferative diabetic retinopathy with macular edema, unspecified eye        |
| DiabetesAny | E08.3291 | Diabetes mellitus due to underlying condition with mild nonproliferative diabetic retinopathy without macular edema, right eye           |
| DiabetesAny | E08.3292 | Diabetes mellitus due to underlying condition with mild nonproliferative diabetic retinopathy without macular edema, left eye            |
| DiabetesAny | E08.3293 | Diabetes mellitus due to underlying condition with mild nonproliferative diabetic retinopathy without macular edema, bilateral           |
| DiabetesAny | E08.3299 | Diabetes mellitus due to underlying condition with mild nonproliferative diabetic retinopathy without macular edema, unspecified eye     |
| DiabetesAny | E08.3311 | Diabetes mellitus due to underlying condition with moderate nonproliferative diabetic retinopathy with macular edema, right eye          |
| DiabetesAny | E08.3312 | Diabetes mellitus due to underlying condition with moderate nonproliferative diabetic retinopathy with macular edema, left eye           |
| DiabetesAny | E08.3313 | Diabetes mellitus due to underlying condition with moderate nonproliferative diabetic retinopathy with macular edema, bilateral          |
| DiabetesAny | E08.3319 | Diabetes mellitus due to underlying condition with moderate nonproliferative diabetic retinopathy with macular edema, unspecified eye    |
| DiabetesAny | E08.3391 | Diabetes mellitus due to underlying condition with moderate nonproliferative diabetic retinopathy without macular edema, right eye       |
| DiabetesAny | E08.3392 | Diabetes mellitus due to underlying condition with moderate nonproliferative diabetic retinopathy without macular edema, left eye        |
| DiabetesAny | E08.3393 | Diabetes mellitus due to underlying condition with moderate nonproliferative diabetic retinopathy without macular edema, bilateral       |
| DiabetesAny | E08.3399 | Diabetes mellitus due to underlying condition with moderate nonproliferative diabetic retinopathy without macular edema, unspecified eye |
| DiabetesAny | E08.3411 | Diabetes mellitus due to underlying condition with severe nonproliferative diabetic retinopathy with macular edema, right eye            |
| DiabetesAny | E08.3412 | Diabetes mellitus due to underlying condition with severe nonproliferative diabetic retinopathy with macular edema, left eye             |
| DiabetesAny | E08.3413 | Diabetes mellitus due to underlying condition with severe nonproliferative diabetic retinopathy with macular edema, bilateral            |
| DiabetesAny | E08.3419 | Diabetes mellitus due to underlying condition with severe nonproliferative diabetic retinopathy with macular edema, unspecified eye      |
| DiabetesAny | E08.3491 | Diabetes mellitus due to underlying condition with severe nonproliferative diabetic retinopathy without macular edema, right eye         |
| DiabetesAny | E08.3492 | Diabetes mellitus due to underlying condition with severe nonproliferative diabetic retinopathy without macular edema, left eye          |
| DiabetesAny | E08.3493 | Diabetes mellitus due to underlying condition with severe nonproliferative diabetic retinopathy without macular edema, bilateral         |
| DiabetesAny | E08.3499 | Diabetes mellitus due to underlying condition with severe nonproliferative diabetic retinopathy without macular edema, unspecified eye   |

|             |          |                                                                                                                                                                                    |
|-------------|----------|------------------------------------------------------------------------------------------------------------------------------------------------------------------------------------|
| DiabetesAny | E08.3511 | Diabetes mellitus due to underlying condition with proliferative diabetic retinopathy with macular edema, right eye                                                                |
| DiabetesAny | E08.3512 | Diabetes mellitus due to underlying condition with proliferative diabetic retinopathy with macular edema, left eye                                                                 |
| DiabetesAny | E08.3513 | Diabetes mellitus due to underlying condition with proliferative diabetic retinopathy with macular edema, bilateral                                                                |
| DiabetesAny | E08.3519 | Diabetes mellitus due to underlying condition with proliferative diabetic retinopathy with macular edema, unspecified eye                                                          |
| DiabetesAny | E08.3521 | Diabetes mellitus due to underlying condition with proliferative diabetic retinopathy with traction retinal detachment involving the macula, right eye                             |
| DiabetesAny | E08.3522 | Diabetes mellitus due to underlying condition with proliferative diabetic retinopathy with traction retinal detachment involving the macula, left eye                              |
| DiabetesAny | E08.3523 | Diabetes mellitus due to underlying condition with proliferative diabetic retinopathy with traction retinal detachment involving the macula, bilateral                             |
| DiabetesAny | E08.3529 | Diabetes mellitus due to underlying condition with proliferative diabetic retinopathy with traction retinal detachment involving the macula, unspecified eye                       |
| DiabetesAny | E08.3531 | Diabetes mellitus due to underlying condition with proliferative diabetic retinopathy with traction retinal detachment not involving the macula, right eye                         |
| DiabetesAny | E08.3532 | Diabetes mellitus due to underlying condition with proliferative diabetic retinopathy with traction retinal detachment not involving the macula, left eye                          |
| DiabetesAny | E08.3533 | Diabetes mellitus due to underlying condition with proliferative diabetic retinopathy with traction retinal detachment not involving the macula, bilateral                         |
| DiabetesAny | E08.3539 | Diabetes mellitus due to underlying condition with proliferative diabetic retinopathy with traction retinal detachment not involving the macula, unspecified eye                   |
| DiabetesAny | E08.3541 | Diabetes mellitus due to underlying condition with proliferative diabetic retinopathy with combined traction retinal detachment and rhegmatogenous retinal detachment, right eye   |
| DiabetesAny | E08.3542 | Diabetes mellitus due to underlying condition with proliferative diabetic retinopathy with combined traction retinal detachment and rhegmatogenous retinal detachment, left eye    |
| DiabetesAny | E08.3543 | Diabetes mellitus due to underlying condition with proliferative diabetic retinopathy with combined traction retinal detachment and rhegmatogenous retinal detachment, bilateral   |
| DiabetesAny | E08.3549 | Diabetes mellitus due to underlying condition with proliferative diabetic retinopathy with combined traction retinal detachment and rhegmatogenous retinal detachment, unspecified |
| DiabetesAny | E08.3551 | Diabetes mellitus due to underlying condition with stable proliferative diabetic retinopathy, right eye                                                                            |
| DiabetesAny | E08.3552 | Diabetes mellitus due to underlying condition with stable proliferative diabetic retinopathy, left eye                                                                             |
| DiabetesAny | E08.3553 | Diabetes mellitus due to underlying condition with stable proliferative diabetic retinopathy, bilateral                                                                            |
| DiabetesAny | E08.3559 | Diabetes mellitus due to underlying condition with stable proliferative diabetic retinopathy, unspecified eye                                                                      |
| DiabetesAny | E08.3591 | Diabetes mellitus due to underlying condition with proliferative diabetic retinopathy without macular edema, right eye                                                             |
| DiabetesAny | E08.3592 | Diabetes mellitus due to underlying condition with proliferative diabetic retinopathy without macular edema, left eye                                                              |
| DiabetesAny | E08.3593 | Diabetes mellitus due to underlying condition with proliferative diabetic retinopathy without macular edema, bilateral                                                             |
| DiabetesAny | E08.3599 | Diabetes mellitus due to underlying condition with proliferative diabetic retinopathy without macular edema, unspecified eye                                                       |
| DiabetesAny | E08.36   | Diabetes mellitus due to underlying condition with diabetic cataract                                                                                                               |
| DiabetesAny | E08.37X1 | Diabetes mellitus due to underlying condition with diabetic macular edema, resolved following treatment, right eye                                                                 |
| DiabetesAny | E08.37X2 | Diabetes mellitus due to underlying condition with diabetic macular edema, resolved following treatment, left eye                                                                  |
| DiabetesAny | E08.37X3 | Diabetes mellitus due to underlying condition with diabetic macular edema, resolved following treatment, bilateral                                                                 |

|             |          |                                                                                                                                |
|-------------|----------|--------------------------------------------------------------------------------------------------------------------------------|
| DiabetesAny | E08.37X9 | Diabetes mellitus due to underlying condition with diabetic macular edema, resolved following treatment, unspecified eye       |
| DiabetesAny | E08.39   | Diabetes mellitus due to underlying condition with other diabetic ophthalmic complication                                      |
| DiabetesAny | E08.40   | Diabetes mellitus due to underlying condition with diabetic neuropathy, unspecified                                            |
| DiabetesAny | E08.41   | Diabetes mellitus due to underlying condition with diabetic mononeuropathy                                                     |
| DiabetesAny | E08.42   | Diabetes mellitus due to underlying condition with diabetic polyneuropathy                                                     |
| DiabetesAny | E08.43   | Diabetes mellitus due to underlying condition with diabetic autonomic (poly)neuropathy                                         |
| DiabetesAny | E08.44   | Diabetes mellitus due to underlying condition with diabetic amyotrophy                                                         |
| DiabetesAny | E08.49   | Diabetes mellitus due to underlying condition with other diabetic neurological complication                                    |
| DiabetesAny | E08.51   | Diabetes mellitus due to underlying condition with diabetic peripheral angiopathy without gangrene                             |
| DiabetesAny | E08.52   | Diabetes mellitus due to underlying condition with diabetic peripheral angiopathy with gangrene                                |
| DiabetesAny | E08.59   | Diabetes mellitus due to underlying condition with other circulatory complications                                             |
| DiabetesAny | E08.610  | Diabetes mellitus due to underlying condition with diabetic neuropathic arthropathy                                            |
| DiabetesAny | E08.618  | Diabetes mellitus due to underlying condition with other diabetic arthropathy                                                  |
| DiabetesAny | E08.620  | Diabetes mellitus due to underlying condition with diabetic dermatitis                                                         |
| DiabetesAny | E08.621  | Diabetes mellitus due to underlying condition with foot ulcer                                                                  |
| DiabetesAny | E08.622  | Diabetes mellitus due to underlying condition with other skin ulcer                                                            |
| DiabetesAny | E08.628  | Diabetes mellitus due to underlying condition with other skin complications                                                    |
| DiabetesAny | E08.630  | Diabetes mellitus due to underlying condition with periodontal disease                                                         |
| DiabetesAny | E08.638  | Diabetes mellitus due to underlying condition with other oral complications                                                    |
| DiabetesAny | E08.641  | Diabetes mellitus due to underlying condition with hypoglycemia with coma                                                      |
| DiabetesAny | E08.649  | Diabetes mellitus due to underlying condition with hypoglycemia without coma                                                   |
| DiabetesAny | E08.65   | Diabetes mellitus due to underlying condition with hyperglycemia                                                               |
| DiabetesAny | E08.69   | Diabetes mellitus due to underlying condition with other specified complication                                                |
| DiabetesAny | E08.8    | Diabetes mellitus due to underlying condition with unspecified complications                                                   |
| DiabetesAny | E08.9    | Diabetes mellitus due to underlying condition without complications                                                            |
| DiabetesAny | E09.00   | Drug or chemical induced diabetes mellitus with hyperosmolarity without nonketotic hyperglycemic-hyperosmolar coma (NKHHC)     |
| DiabetesAny | E09.01   | Drug or chemical induced diabetes mellitus with hyperosmolarity with coma                                                      |
| DiabetesAny | E09.10   | Drug or chemical induced diabetes mellitus with ketoacidosis without coma                                                      |
| DiabetesAny | E09.11   | Drug or chemical induced diabetes mellitus with ketoacidosis with coma                                                         |
| DiabetesAny | E09.21   | Drug or chemical induced diabetes mellitus with diabetic nephropathy                                                           |
| DiabetesAny | E09.22   | Drug or chemical induced diabetes mellitus with diabetic chronic kidney disease                                                |
| DiabetesAny | E09.29   | Drug or chemical induced diabetes mellitus with other diabetic kidney complication                                             |
| DiabetesAny | E09.311  | Drug or chemical induced diabetes mellitus with unspecified diabetic retinopathy with macular edema                            |
| DiabetesAny | E09.319  | Drug or chemical induced diabetes mellitus with unspecified diabetic retinopathy without macular edema                         |
| DiabetesAny | E09.3211 | Drug or chemical induced diabetes mellitus with mild nonproliferative diabetic retinopathy with macular edema, right eye       |
| DiabetesAny | E09.3212 | Drug or chemical induced diabetes mellitus with mild nonproliferative diabetic retinopathy with macular edema, left eye        |
| DiabetesAny | E09.3213 | Drug or chemical induced diabetes mellitus with mild nonproliferative diabetic retinopathy with macular edema, bilateral       |
| DiabetesAny | E09.3219 | Drug or chemical induced diabetes mellitus with mild nonproliferative diabetic retinopathy with macular edema, unspecified eye |

|             |          |                                                                                                                                                                               |
|-------------|----------|-------------------------------------------------------------------------------------------------------------------------------------------------------------------------------|
| DiabetesAny | E09.3291 | Drug or chemical induced diabetes mellitus with mild nonproliferative diabetic retinopathy without macular edema, right eye                                                   |
| DiabetesAny | E09.3292 | Drug or chemical induced diabetes mellitus with mild nonproliferative diabetic retinopathy without macular edema, left eye                                                    |
| DiabetesAny | E09.3293 | Drug or chemical induced diabetes mellitus with mild nonproliferative diabetic retinopathy without macular edema, bilateral                                                   |
| DiabetesAny | E09.3299 | Drug or chemical induced diabetes mellitus with mild nonproliferative diabetic retinopathy without macular edema, unspecified eye                                             |
| DiabetesAny | E09.3311 | Drug or chemical induced diabetes mellitus with moderate nonproliferative diabetic retinopathy with macular edema, right eye                                                  |
| DiabetesAny | E09.3312 | Drug or chemical induced diabetes mellitus with moderate nonproliferative diabetic retinopathy with macular edema, left eye                                                   |
| DiabetesAny | E09.3313 | Drug or chemical induced diabetes mellitus with moderate nonproliferative diabetic retinopathy with macular edema, bilateral                                                  |
| DiabetesAny | E09.3319 | Drug or chemical induced diabetes mellitus with moderate nonproliferative diabetic retinopathy with macular edema, unspecified eye                                            |
| DiabetesAny | E09.3391 | Drug or chemical induced diabetes mellitus with moderate nonproliferative diabetic retinopathy without macular edema, right eye                                               |
| DiabetesAny | E09.3392 | Drug or chemical induced diabetes mellitus with moderate nonproliferative diabetic retinopathy without macular edema, left eye                                                |
| DiabetesAny | E09.3393 | Drug or chemical induced diabetes mellitus with moderate nonproliferative diabetic retinopathy without macular edema, bilateral                                               |
| DiabetesAny | E09.3399 | Drug or chemical induced diabetes mellitus with moderate nonproliferative diabetic retinopathy without macular edema, unspecified eye                                         |
| DiabetesAny | E09.3411 | Drug or chemical induced diabetes mellitus with severe nonproliferative diabetic retinopathy with macular edema, right eye                                                    |
| DiabetesAny | E09.3412 | Drug or chemical induced diabetes mellitus with severe nonproliferative diabetic retinopathy with macular edema, left eye                                                     |
| DiabetesAny | E09.3413 | Drug or chemical induced diabetes mellitus with severe nonproliferative diabetic retinopathy with macular edema, bilateral                                                    |
| DiabetesAny | E09.3419 | Drug or chemical induced diabetes mellitus with severe nonproliferative diabetic retinopathy with macular edema, unspecified eye                                              |
| DiabetesAny | E09.3493 | Drug or chemical induced diabetes mellitus with severe nonproliferative diabetic retinopathy without macular edema, bilateral                                                 |
| DiabetesAny | E09.3499 | Drug or chemical induced diabetes mellitus with severe nonproliferative diabetic retinopathy without macular edema, unspecified eye                                           |
| DiabetesAny | E09.3511 | Drug or chemical induced diabetes mellitus with proliferative diabetic retinopathy with macular edema, right eye                                                              |
| DiabetesAny | E09.3512 | Drug or chemical induced diabetes mellitus with proliferative diabetic retinopathy with macular edema, left eye                                                               |
| DiabetesAny | E09.3513 | Drug or chemical induced diabetes mellitus with proliferative diabetic retinopathy with macular edema, bilateral                                                              |
| DiabetesAny | E09.3519 | Drug or chemical induced diabetes mellitus with proliferative diabetic retinopathy with macular edema, unspecified eye                                                        |
| DiabetesAny | E09.3522 | Drug or chemical induced diabetes mellitus with proliferative diabetic retinopathy with traction retinal detachment involving the macula, left eye                            |
| DiabetesAny | E09.3533 | Drug or chemical induced diabetes mellitus with proliferative diabetic retinopathy with traction retinal detachment not involving the macula, bilateral                       |
| DiabetesAny | E09.3541 | Drug or chemical induced diabetes mellitus with proliferative diabetic retinopathy with combined traction retinal detachment and rhegmatogenous retinal detachment, right eye |
| DiabetesAny | E09.3542 | Drug or chemical induced diabetes mellitus with proliferative diabetic retinopathy with combined traction retinal detachment and rhegmatogenous retinal detachment, left eye  |
| DiabetesAny | E09.3551 | Drug or chemical induced diabetes mellitus with stable proliferative diabetic retinopathy, right eye                                                                          |

|             |          |                                                                                                                           |
|-------------|----------|---------------------------------------------------------------------------------------------------------------------------|
| DiabetesAny | E09.3552 | Drug or chemical induced diabetes mellitus with stable proliferative diabetic retinopathy, left eye                       |
| DiabetesAny | E09.3553 | Drug or chemical induced diabetes mellitus with stable proliferative diabetic retinopathy, bilateral                      |
| DiabetesAny | E09.3559 | Drug or chemical induced diabetes mellitus with stable proliferative diabetic retinopathy, unspecified eye                |
| DiabetesAny | E09.3591 | Drug or chemical induced diabetes mellitus with proliferative diabetic retinopathy without macular edema, right eye       |
| DiabetesAny | E09.3592 | Drug or chemical induced diabetes mellitus with proliferative diabetic retinopathy without macular edema, left eye        |
| DiabetesAny | E09.3593 | Drug or chemical induced diabetes mellitus with proliferative diabetic retinopathy without macular edema, bilateral       |
| DiabetesAny | E09.3599 | Drug or chemical induced diabetes mellitus with proliferative diabetic retinopathy without macular edema, unspecified eye |
| DiabetesAny | E09.36   | Drug or chemical induced diabetes mellitus with diabetic cataract                                                         |
| DiabetesAny | E09.37X1 | Drug or chemical induced diabetes mellitus with diabetic macular edema, resolved following treatment, right eye           |
| DiabetesAny | E09.37X2 | Drug or chemical induced diabetes mellitus with diabetic macular edema, resolved following treatment, left eye            |
| DiabetesAny | E09.37X3 | Drug or chemical induced diabetes mellitus with diabetic macular edema, resolved following treatment, bilateral           |
| DiabetesAny | E09.39   | Drug or chemical induced diabetes mellitus with other diabetic ophthalmic complication                                    |
| DiabetesAny | E09.40   | Drug or chemical induced diabetes mellitus with neurological complications with diabetic neuropathy, unspecified          |
| DiabetesAny | E09.41   | Drug or chemical induced diabetes mellitus with neurological complications with diabetic mononeuropathy                   |
| DiabetesAny | E09.42   | Drug or chemical induced diabetes mellitus with neurological complications with diabetic polyneuropathy                   |
| DiabetesAny | E09.43   | Drug or chemical induced diabetes mellitus with neurological complications with diabetic autonomic (poly)neuropathy       |
| DiabetesAny | E09.44   | Drug or chemical induced diabetes mellitus with neurological complications with diabetic amyotrophy                       |
| DiabetesAny | E09.49   | Drug or chemical induced diabetes mellitus with neurological complications with other diabetic neurological complication  |
| DiabetesAny | E09.51   | Drug or chemical induced diabetes mellitus with diabetic peripheral angiopathy without gangrene                           |
| DiabetesAny | E09.52   | Drug or chemical induced diabetes mellitus with diabetic peripheral angiopathy with gangrene                              |
| DiabetesAny | E09.59   | Drug or chemical induced diabetes mellitus with other circulatory complications                                           |
| DiabetesAny | E09.610  | Drug or chemical induced diabetes mellitus with diabetic neuropathic arthropathy                                          |
| DiabetesAny | E09.618  | Drug or chemical induced diabetes mellitus with other diabetic arthropathy                                                |
| DiabetesAny | E09.620  | Drug or chemical induced diabetes mellitus with diabetic dermatitis                                                       |
| DiabetesAny | E09.621  | Drug or chemical induced diabetes mellitus with foot ulcer                                                                |
| DiabetesAny | E09.622  | Drug or chemical induced diabetes mellitus with other skin ulcer                                                          |
| DiabetesAny | E09.628  | Drug or chemical induced diabetes mellitus with other skin complications                                                  |
| DiabetesAny | E09.630  | Drug or chemical induced diabetes mellitus with periodontal disease                                                       |
| DiabetesAny | E09.638  | Drug or chemical induced diabetes mellitus with other oral complications                                                  |
| DiabetesAny | E09.641  | Drug or chemical induced diabetes mellitus with hypoglycemia with coma                                                    |
| DiabetesAny | E09.649  | Drug or chemical induced diabetes mellitus with hypoglycemia without coma                                                 |
| DiabetesAny | E09.65   | Drug or chemical induced diabetes mellitus with hyperglycemia                                                             |
| DiabetesAny | E09.69   | Drug or chemical induced diabetes mellitus with other specified complication                                              |

|             |          |                                                                                                                     |
|-------------|----------|---------------------------------------------------------------------------------------------------------------------|
| DiabetesAny | E09.8    | Drug or chemical induced diabetes mellitus with unspecified complications                                           |
| DiabetesAny | E09.9    | Drug or chemical induced diabetes mellitus without complications                                                    |
| DiabetesAny | E10.10   | Type 1 diabetes mellitus with ketoacidosis without coma                                                             |
| DiabetesAny | E10.11   | Type 1 diabetes mellitus with ketoacidosis with coma                                                                |
| DiabetesAny | E10.21   | Type 1 diabetes mellitus with diabetic nephropathy                                                                  |
| DiabetesAny | E10.22   | Type 1 diabetes mellitus with diabetic chronic kidney disease                                                       |
| DiabetesAny | E10.29   | Type 1 diabetes mellitus with other diabetic kidney complication                                                    |
| DiabetesAny | E10.311  | Type 1 diabetes mellitus with unspecified diabetic retinopathy with macular edema                                   |
| DiabetesAny | E10.319  | Type 1 diabetes mellitus with unspecified diabetic retinopathy without macular edema                                |
| DiabetesAny | E10.3211 | Type 1 diabetes mellitus with mild nonproliferative diabetic retinopathy with macular edema, right eye              |
| DiabetesAny | E10.3212 | Type 1 diabetes mellitus with mild nonproliferative diabetic retinopathy with macular edema, left eye               |
| DiabetesAny | E10.3213 | Type 1 diabetes mellitus with mild nonproliferative diabetic retinopathy with macular edema, bilateral              |
| DiabetesAny | E10.3219 | Type 1 diabetes mellitus with mild nonproliferative diabetic retinopathy with macular edema, unspecified eye        |
| DiabetesAny | E10.3291 | Type 1 diabetes mellitus with mild nonproliferative diabetic retinopathy without macular edema, right eye           |
| DiabetesAny | E10.3292 | Type 1 diabetes mellitus with mild nonproliferative diabetic retinopathy without macular edema, left eye            |
| DiabetesAny | E10.3293 | Type 1 diabetes mellitus with mild nonproliferative diabetic retinopathy without macular edema, bilateral           |
| DiabetesAny | E10.3299 | Type 1 diabetes mellitus with mild nonproliferative diabetic retinopathy without macular edema, unspecified eye     |
| DiabetesAny | E10.3311 | Type 1 diabetes mellitus with moderate nonproliferative diabetic retinopathy with macular edema, right eye          |
| DiabetesAny | E10.3312 | Type 1 diabetes mellitus with moderate nonproliferative diabetic retinopathy with macular edema, left eye           |
| DiabetesAny | E10.3313 | Type 1 diabetes mellitus with moderate nonproliferative diabetic retinopathy with macular edema, bilateral          |
| DiabetesAny | E10.3319 | Type 1 diabetes mellitus with moderate nonproliferative diabetic retinopathy with macular edema, unspecified eye    |
| DiabetesAny | E10.3391 | Type 1 diabetes mellitus with moderate nonproliferative diabetic retinopathy without macular edema, right eye       |
| DiabetesAny | E10.3392 | Type 1 diabetes mellitus with moderate nonproliferative diabetic retinopathy without macular edema, left eye        |
| DiabetesAny | E10.3393 | Type 1 diabetes mellitus with moderate nonproliferative diabetic retinopathy without macular edema, bilateral       |
| DiabetesAny | E10.3399 | Type 1 diabetes mellitus with moderate nonproliferative diabetic retinopathy without macular edema, unspecified eye |
| DiabetesAny | E10.3411 | Type 1 diabetes mellitus with severe nonproliferative diabetic retinopathy with macular edema, right eye            |
| DiabetesAny | E10.3412 | Type 1 diabetes mellitus with severe nonproliferative diabetic retinopathy with macular edema, left eye             |
| DiabetesAny | E10.3413 | Type 1 diabetes mellitus with severe nonproliferative diabetic retinopathy with macular edema, bilateral            |
| DiabetesAny | E10.3419 | Type 1 diabetes mellitus with severe nonproliferative diabetic retinopathy with macular edema, unspecified eye      |
| DiabetesAny | E10.3491 | Type 1 diabetes mellitus with severe nonproliferative diabetic retinopathy without macular edema, right eye         |
| DiabetesAny | E10.3492 | Type 1 diabetes mellitus with severe nonproliferative diabetic retinopathy without macular edema, left eye          |

|             |          |                                                                                                                                                                   |
|-------------|----------|-------------------------------------------------------------------------------------------------------------------------------------------------------------------|
| DiabetesAny | E10.3493 | Type 1 diabetes mellitus with severe nonproliferative diabetic retinopathy without macular edema, bilateral                                                       |
| DiabetesAny | E10.3499 | Type 1 diabetes mellitus with severe nonproliferative diabetic retinopathy without macular edema, unspecified eye                                                 |
| DiabetesAny | E10.3511 | Type 1 diabetes mellitus with proliferative diabetic retinopathy with macular edema, right eye                                                                    |
| DiabetesAny | E10.3512 | Type 1 diabetes mellitus with proliferative diabetic retinopathy with macular edema, left eye                                                                     |
| DiabetesAny | E10.3513 | Type 1 diabetes mellitus with proliferative diabetic retinopathy with macular edema, bilateral                                                                    |
| DiabetesAny | E10.3519 | Type 1 diabetes mellitus with proliferative diabetic retinopathy with macular edema, unspecified eye                                                              |
| DiabetesAny | E10.3521 | Type 1 diabetes mellitus with proliferative diabetic retinopathy with traction retinal detachment involving the macula, right eye                                 |
| DiabetesAny | E10.3522 | Type 1 diabetes mellitus with proliferative diabetic retinopathy with traction retinal detachment involving the macula, left eye                                  |
| DiabetesAny | E10.3523 | Type 1 diabetes mellitus with proliferative diabetic retinopathy with traction retinal detachment involving the macula, bilateral                                 |
| DiabetesAny | E10.3529 | Type 1 diabetes mellitus with proliferative diabetic retinopathy with traction retinal detachment involving the macula, unspecified eye                           |
| DiabetesAny | E10.3531 | Type 1 diabetes mellitus with proliferative diabetic retinopathy with traction retinal detachment not involving the macula, right eye                             |
| DiabetesAny | E10.3532 | Type 1 diabetes mellitus with proliferative diabetic retinopathy with traction retinal detachment not involving the macula, left eye                              |
| DiabetesAny | E10.3533 | Type 1 diabetes mellitus with proliferative diabetic retinopathy with traction retinal detachment not involving the macula, bilateral                             |
| DiabetesAny | E10.3539 | Type 1 diabetes mellitus with proliferative diabetic retinopathy with traction retinal detachment not involving the macula, unspecified eye                       |
| DiabetesAny | E10.3541 | Type 1 diabetes mellitus with proliferative diabetic retinopathy with combined traction retinal detachment and rhegmatogenous retinal detachment, right eye       |
| DiabetesAny | E10.3542 | Type 1 diabetes mellitus with proliferative diabetic retinopathy with combined traction retinal detachment and rhegmatogenous retinal detachment, left eye        |
| DiabetesAny | E10.3543 | Type 1 diabetes mellitus with proliferative diabetic retinopathy with combined traction retinal detachment and rhegmatogenous retinal detachment, bilateral       |
| DiabetesAny | E10.3549 | Type 1 diabetes mellitus with proliferative diabetic retinopathy with combined traction retinal detachment and rhegmatogenous retinal detachment, unspecified eye |
| DiabetesAny | E10.3551 | Type 1 diabetes mellitus with stable proliferative diabetic retinopathy, right eye                                                                                |
| DiabetesAny | E10.3552 | Type 1 diabetes mellitus with stable proliferative diabetic retinopathy, left eye                                                                                 |
| DiabetesAny | E10.3553 | Type 1 diabetes mellitus with stable proliferative diabetic retinopathy, bilateral                                                                                |
| DiabetesAny | E10.3559 | Type 1 diabetes mellitus with stable proliferative diabetic retinopathy, unspecified eye                                                                          |
| DiabetesAny | E10.3591 | Type 1 diabetes mellitus with proliferative diabetic retinopathy without macular edema, right eye                                                                 |
| DiabetesAny | E10.3592 | Type 1 diabetes mellitus with proliferative diabetic retinopathy without macular edema, left eye                                                                  |
| DiabetesAny | E10.3593 | Type 1 diabetes mellitus with proliferative diabetic retinopathy without macular edema, bilateral                                                                 |
| DiabetesAny | E10.3599 | Type 1 diabetes mellitus with proliferative diabetic retinopathy without macular edema, unspecified eye                                                           |
| DiabetesAny | E10.36   | Type 1 diabetes mellitus with diabetic cataract                                                                                                                   |
| DiabetesAny | E10.37X1 | Type 1 diabetes mellitus with diabetic macular edema, resolved following treatment, right eye                                                                     |
| DiabetesAny | E10.37X2 | Type 1 diabetes mellitus with diabetic macular edema, resolved following treatment, left eye                                                                      |
| DiabetesAny | E10.37X3 | Type 1 diabetes mellitus with diabetic macular edema, resolved following treatment, bilateral                                                                     |
| DiabetesAny | E10.37X9 | Type 1 diabetes mellitus with diabetic macular edema, resolved following treatment, unspecified eye                                                               |

|             |          |                                                                                                              |
|-------------|----------|--------------------------------------------------------------------------------------------------------------|
| DiabetesAny | E10.39   | Type 1 diabetes mellitus with other diabetic ophthalmic complication                                         |
| DiabetesAny | E10.40   | Type 1 diabetes mellitus with diabetic neuropathy, unspecified                                               |
| DiabetesAny | E10.41   | Type 1 diabetes mellitus with diabetic mononeuropathy                                                        |
| DiabetesAny | E10.42   | Type 1 diabetes mellitus with diabetic polyneuropathy                                                        |
| DiabetesAny | E10.43   | Type 1 diabetes mellitus with diabetic autonomic (poly)neuropathy                                            |
| DiabetesAny | E10.44   | Type 1 diabetes mellitus with diabetic amyotrophy                                                            |
| DiabetesAny | E10.49   | Type 1 diabetes mellitus with other diabetic neurological complication                                       |
| DiabetesAny | E10.51   | Type 1 diabetes mellitus with diabetic peripheral angiopathy without gangrene                                |
| DiabetesAny | E10.52   | Type 1 diabetes mellitus with diabetic peripheral angiopathy with gangrene                                   |
| DiabetesAny | E10.59   | Type 1 diabetes mellitus with other circulatory complications                                                |
| DiabetesAny | E10.610  | Type 1 diabetes mellitus with diabetic neuropathic arthropathy                                               |
| DiabetesAny | E10.618  | Type 1 diabetes mellitus with other diabetic arthropathy                                                     |
| DiabetesAny | E10.620  | Type 1 diabetes mellitus with diabetic dermatitis                                                            |
| DiabetesAny | E10.621  | Type 1 diabetes mellitus with foot ulcer                                                                     |
| DiabetesAny | E10.622  | Type 1 diabetes mellitus with other skin ulcer                                                               |
| DiabetesAny | E10.628  | Type 1 diabetes mellitus with other skin complications                                                       |
| DiabetesAny | E10.630  | Type 1 diabetes mellitus with periodontal disease                                                            |
| DiabetesAny | E10.638  | Type 1 diabetes mellitus with other oral complications                                                       |
| DiabetesAny | E10.641  | Type 1 diabetes mellitus with hypoglycemia with coma                                                         |
| DiabetesAny | E10.649  | Type 1 diabetes mellitus with hypoglycemia without coma                                                      |
| DiabetesAny | E10.65   | Type 1 diabetes mellitus with hyperglycemia                                                                  |
| DiabetesAny | E10.69   | Type 1 diabetes mellitus with other specified complication                                                   |
| DiabetesAny | E10.8    | Type 1 diabetes mellitus with unspecified complications                                                      |
| DiabetesAny | E10.9    | Type 1 diabetes mellitus without complications                                                               |
| DiabetesAny | E11.00   | Type 2 diabetes mellitus with hyperosmolarity without nonketotic hyperglycemic-hyperosmolar coma (NKHHC)     |
| DiabetesAny | E11.01   | Type 2 diabetes mellitus with hyperosmolarity with coma                                                      |
| DiabetesAny | E11.10   | Type 2 diabetes mellitus with ketoacidosis without coma                                                      |
| DiabetesAny | E11.11   | Type 2 diabetes mellitus with ketoacidosis with coma                                                         |
| DiabetesAny | E11.21   | Type 2 diabetes mellitus with diabetic nephropathy                                                           |
| DiabetesAny | E11.22   | Type 2 diabetes mellitus with diabetic chronic kidney disease                                                |
| DiabetesAny | E11.29   | Type 2 diabetes mellitus with other diabetic kidney complication                                             |
| DiabetesAny | E11.311  | Type 2 diabetes mellitus with unspecified diabetic retinopathy with macular edema                            |
| DiabetesAny | E11.319  | Type 2 diabetes mellitus with unspecified diabetic retinopathy without macular edema                         |
| DiabetesAny | E11.321  | Type 2 Diabetes Mellitus with Mild Nonproliferative Diabetic Retinopathy with Macular Edema                  |
| DiabetesAny | E11.3211 | Type 2 diabetes mellitus with mild nonproliferative diabetic retinopathy with macular edema, right eye       |
| DiabetesAny | E11.3212 | Type 2 diabetes mellitus with mild nonproliferative diabetic retinopathy with macular edema, left eye        |
| DiabetesAny | E11.3213 | Type 2 diabetes mellitus with mild nonproliferative diabetic retinopathy with macular edema, bilateral       |
| DiabetesAny | E11.3219 | Type 2 diabetes mellitus with mild nonproliferative diabetic retinopathy with macular edema, unspecified eye |
| DiabetesAny | E11.329  | Type 2 Diabetes Mellitus with Mild Nonproliferative Diabetic Retinopathy without Macular Edema               |



|             |          |                                                                                                                                   |
|-------------|----------|-----------------------------------------------------------------------------------------------------------------------------------|
| DiabetesAny | E11.3291 | Type 2 diabetes mellitus with mild nonproliferative diabetic retinopathy without macular edema, right eye                         |
| DiabetesAny | E11.3292 | Type 2 diabetes mellitus with mild nonproliferative diabetic retinopathy without macular edema, left eye                          |
| DiabetesAny | E11.3293 | Type 2 diabetes mellitus with mild nonproliferative diabetic retinopathy without macular edema, bilateral                         |
| DiabetesAny | E11.3299 | Type 2 diabetes mellitus with mild nonproliferative diabetic retinopathy without macular edema, unspecified eye                   |
| DiabetesAny | E11.3311 | Type 2 diabetes mellitus with moderate nonproliferative diabetic retinopathy with macular edema, right eye                        |
| DiabetesAny | E11.3312 | Type 2 diabetes mellitus with moderate nonproliferative diabetic retinopathy with macular edema, left eye                         |
| DiabetesAny | E11.3313 | Type 2 diabetes mellitus with moderate nonproliferative diabetic retinopathy with macular edema, bilateral                        |
| DiabetesAny | E11.3319 | Type 2 diabetes mellitus with moderate nonproliferative diabetic retinopathy with macular edema, unspecified eye                  |
| DiabetesAny | E11.339  | Type 2 Diabetes Mellitus with Moderate Nonproliferative Diabetic Retinopathy without Macular Edema                                |
| DiabetesAny | E11.3391 | Type 2 diabetes mellitus with moderate nonproliferative diabetic retinopathy without macular edema, right eye                     |
| DiabetesAny | E11.3392 | Type 2 diabetes mellitus with moderate nonproliferative diabetic retinopathy without macular edema, left eye                      |
| DiabetesAny | E11.3393 | Type 2 diabetes mellitus with moderate nonproliferative diabetic retinopathy without macular edema, bilateral                     |
| DiabetesAny | E11.3399 | Type 2 diabetes mellitus with moderate nonproliferative diabetic retinopathy without macular edema, unspecified eye               |
| DiabetesAny | E11.341  | Type 2 Diabetes Mellitus with Severe Nonproliferative Diabetic Retinopathy with Macular Edema                                     |
| DiabetesAny | E11.3411 | Type 2 diabetes mellitus with severe nonproliferative diabetic retinopathy with macular edema, right eye                          |
| DiabetesAny | E11.3412 | Type 2 diabetes mellitus with severe nonproliferative diabetic retinopathy with macular edema, left eye                           |
| DiabetesAny | E11.3413 | Type 2 diabetes mellitus with severe nonproliferative diabetic retinopathy with macular edema, bilateral                          |
| DiabetesAny | E11.3419 | Type 2 diabetes mellitus with severe nonproliferative diabetic retinopathy with macular edema, unspecified eye                    |
| DiabetesAny | E11.3491 | Type 2 diabetes mellitus with severe nonproliferative diabetic retinopathy without macular edema, right eye                       |
| DiabetesAny | E11.3492 | Type 2 diabetes mellitus with severe nonproliferative diabetic retinopathy without macular edema, left eye                        |
| DiabetesAny | E11.3493 | Type 2 diabetes mellitus with severe nonproliferative diabetic retinopathy without macular edema, bilateral                       |
| DiabetesAny | E11.3499 | Type 2 diabetes mellitus with severe nonproliferative diabetic retinopathy without macular edema, unspecified eye                 |
| DiabetesAny | E11.351  | Type 2 Diabetes Mellitus with Proliferative Diabetic Retinopathy with Macular Edema                                               |
| DiabetesAny | E11.3511 | Type 2 diabetes mellitus with proliferative diabetic retinopathy with macular edema, right eye                                    |
| DiabetesAny | E11.3512 | Type 2 diabetes mellitus with proliferative diabetic retinopathy with macular edema, left eye                                     |
| DiabetesAny | E11.3513 | Type 2 diabetes mellitus with proliferative diabetic retinopathy with macular edema, bilateral                                    |
| DiabetesAny | E11.3519 | Type 2 diabetes mellitus with proliferative diabetic retinopathy with macular edema, unspecified eye                              |
| DiabetesAny | E11.3521 | Type 2 diabetes mellitus with proliferative diabetic retinopathy with traction retinal detachment involving the macula, right eye |

|             |          |                                                                                                                                                                   |
|-------------|----------|-------------------------------------------------------------------------------------------------------------------------------------------------------------------|
| DiabetesAny | E11.3522 | Type 2 diabetes mellitus with proliferative diabetic retinopathy with traction retinal detachment involving the macula, left eye                                  |
| DiabetesAny | E11.3523 | Type 2 diabetes mellitus with proliferative diabetic retinopathy with traction retinal detachment involving the macula, bilateral                                 |
| DiabetesAny | E11.3529 | Type 2 diabetes mellitus with proliferative diabetic retinopathy with traction retinal detachment involving the macula, unspecified eye                           |
| DiabetesAny | E11.3531 | Type 2 diabetes mellitus with proliferative diabetic retinopathy with traction retinal detachment not involving the macula, right eye                             |
| DiabetesAny | E11.3532 | Type 2 diabetes mellitus with proliferative diabetic retinopathy with traction retinal detachment not involving the macula, left eye                              |
| DiabetesAny | E11.3533 | Type 2 diabetes mellitus with proliferative diabetic retinopathy with traction retinal detachment not involving the macula, bilateral                             |
| DiabetesAny | E11.3539 | Type 2 diabetes mellitus with proliferative diabetic retinopathy with traction retinal detachment not involving the macula, unspecified eye                       |
| DiabetesAny | E11.3541 | Type 2 diabetes mellitus with proliferative diabetic retinopathy with combined traction retinal detachment and rhegmatogenous retinal detachment, right eye       |
| DiabetesAny | E11.3542 | Type 2 diabetes mellitus with proliferative diabetic retinopathy with combined traction retinal detachment and rhegmatogenous retinal detachment, left eye        |
| DiabetesAny | E11.3543 | Type 2 diabetes mellitus with proliferative diabetic retinopathy with combined traction retinal detachment and rhegmatogenous retinal detachment, bilateral       |
| DiabetesAny | E11.3549 | Type 2 diabetes mellitus with proliferative diabetic retinopathy with combined traction retinal detachment and rhegmatogenous retinal detachment, unspecified eye |
| DiabetesAny | E11.3551 | Type 2 diabetes mellitus with stable proliferative diabetic retinopathy, right eye                                                                                |
| DiabetesAny | E11.3552 | Type 2 diabetes mellitus with stable proliferative diabetic retinopathy, left eye                                                                                 |
| DiabetesAny | E11.3553 | Type 2 diabetes mellitus with stable proliferative diabetic retinopathy, bilateral                                                                                |
| DiabetesAny | E11.3559 | Type 2 diabetes mellitus with stable proliferative diabetic retinopathy, unspecified eye                                                                          |
| DiabetesAny | E11.359  | Type 2 Diabetes Mellitus with Proliferative Diabetic Retinopathy without Macular Edema                                                                            |
| DiabetesAny | E11.3591 | Type 2 diabetes mellitus with proliferative diabetic retinopathy without macular edema, right eye                                                                 |
| DiabetesAny | E11.3592 | Type 2 diabetes mellitus with proliferative diabetic retinopathy without macular edema, left eye                                                                  |
| DiabetesAny | E11.3593 | Type 2 diabetes mellitus with proliferative diabetic retinopathy without macular edema, bilateral                                                                 |
| DiabetesAny | E11.3599 | Type 2 diabetes mellitus with proliferative diabetic retinopathy without macular edema, unspecified eye                                                           |
| DiabetesAny | E11.36   | Type 2 diabetes mellitus with diabetic cataract                                                                                                                   |
| DiabetesAny | E11.37X1 | Type 2 diabetes mellitus with diabetic macular edema, resolved following treatment, right eye                                                                     |
| DiabetesAny | E11.37X2 | Type 2 diabetes mellitus with diabetic macular edema, resolved following treatment, left eye                                                                      |
| DiabetesAny | E11.37X3 | Type 2 diabetes mellitus with diabetic macular edema, resolved following treatment, bilateral                                                                     |
| DiabetesAny | E11.37X9 | Type 2 diabetes mellitus with diabetic macular edema, resolved following treatment, unspecified eye                                                               |
| DiabetesAny | E11.39   | Type 2 diabetes mellitus with other diabetic ophthalmic complication                                                                                              |
| DiabetesAny | E11.40   | Type 2 diabetes mellitus with diabetic neuropathy, unspecified                                                                                                    |
| DiabetesAny | E11.41   | Type 2 diabetes mellitus with diabetic mononeuropathy                                                                                                             |
| DiabetesAny | E11.42   | Type 2 diabetes mellitus with diabetic polyneuropathy                                                                                                             |
| DiabetesAny | E11.43   | Type 2 diabetes mellitus with diabetic autonomic (poly)neuropathy                                                                                                 |
| DiabetesAny | E11.44   | Type 2 diabetes mellitus with diabetic amyotrophy                                                                                                                 |
| DiabetesAny | E11.49   | Type 2 diabetes mellitus with other diabetic neurological complication                                                                                            |
| DiabetesAny | E11.51   | Type 2 diabetes mellitus with diabetic peripheral angiopathy without gangrene                                                                                     |
| DiabetesAny | E11.52   | Type 2 diabetes mellitus with diabetic peripheral angiopathy with gangrene                                                                                        |

|             |          |                                                                                                                           |
|-------------|----------|---------------------------------------------------------------------------------------------------------------------------|
| DiabetesAny | E11.59   | Type 2 diabetes mellitus with other circulatory complications                                                             |
| DiabetesAny | E11.610  | Type 2 diabetes mellitus with diabetic neuropathic arthropathy                                                            |
| DiabetesAny | E11.618  | Type 2 diabetes mellitus with other diabetic arthropathy                                                                  |
| DiabetesAny | E11.620  | Type 2 diabetes mellitus with diabetic dermatitis                                                                         |
| DiabetesAny | E11.621  | Type 2 diabetes mellitus with foot ulcer                                                                                  |
| DiabetesAny | E11.622  | Type 2 diabetes mellitus with other skin ulcer                                                                            |
| DiabetesAny | E11.628  | Type 2 diabetes mellitus with other skin complications                                                                    |
| DiabetesAny | E11.630  | Type 2 diabetes mellitus with periodontal disease                                                                         |
| DiabetesAny | E11.638  | Type 2 diabetes mellitus with other oral complications                                                                    |
| DiabetesAny | E11.641  | Type 2 diabetes mellitus with hypoglycemia with coma                                                                      |
| DiabetesAny | E11.649  | Type 2 diabetes mellitus with hypoglycemia without coma                                                                   |
| DiabetesAny | E11.65   | Type 2 diabetes mellitus with hyperglycemia                                                                               |
| DiabetesAny | E11.69   | Type 2 diabetes mellitus with other specified complication                                                                |
| DiabetesAny | E11.8    | Type 2 diabetes mellitus with unspecified complications                                                                   |
| DiabetesAny | E11.9    | Type 2 diabetes mellitus without complications                                                                            |
| DiabetesAny | E13.00   | Other specified diabetes mellitus with hyperosmolarity without nonketotic hyperglycemic-hyperosmolar coma (NKHHC)         |
| DiabetesAny | E13.01   | Other specified diabetes mellitus with hyperosmolarity with coma                                                          |
| DiabetesAny | E13.10   | Other specified diabetes mellitus with ketoacidosis without coma                                                          |
| DiabetesAny | E13.11   | Other specified diabetes mellitus with ketoacidosis with coma                                                             |
| DiabetesAny | E13.21   | Other specified diabetes mellitus with diabetic nephropathy                                                               |
| DiabetesAny | E13.22   | Other specified diabetes mellitus with diabetic chronic kidney disease                                                    |
| DiabetesAny | E13.29   | Other specified diabetes mellitus with other diabetic kidney complication                                                 |
| DiabetesAny | E13.311  | Other specified diabetes mellitus with unspecified diabetic retinopathy with macular edema                                |
| DiabetesAny | E13.319  | Other specified diabetes mellitus with unspecified diabetic retinopathy without macular edema                             |
| DiabetesAny | E13.3211 | Other specified diabetes mellitus with mild nonproliferative diabetic retinopathy with macular edema, right eye           |
| DiabetesAny | E13.3212 | Other specified diabetes mellitus with mild nonproliferative diabetic retinopathy with macular edema, left eye            |
| DiabetesAny | E13.3213 | Other specified diabetes mellitus with mild nonproliferative diabetic retinopathy with macular edema, bilateral           |
| DiabetesAny | E13.3219 | Other specified diabetes mellitus with mild nonproliferative diabetic retinopathy with macular edema, unspecified eye     |
| DiabetesAny | E13.3291 | Other specified diabetes mellitus with mild nonproliferative diabetic retinopathy without macular edema, right eye        |
| DiabetesAny | E13.3292 | Other specified diabetes mellitus with mild nonproliferative diabetic retinopathy without macular edema, left eye         |
| DiabetesAny | E13.3293 | Other specified diabetes mellitus with mild nonproliferative diabetic retinopathy without macular edema, bilateral        |
| DiabetesAny | E13.3299 | Other specified diabetes mellitus with mild nonproliferative diabetic retinopathy without macular edema, unspecified eye  |
| DiabetesAny | E13.3311 | Other specified diabetes mellitus with moderate nonproliferative diabetic retinopathy with macular edema, right eye       |
| DiabetesAny | E13.3312 | Other specified diabetes mellitus with moderate nonproliferative diabetic retinopathy with macular edema, left eye        |
| DiabetesAny | E13.3313 | Other specified diabetes mellitus with moderate nonproliferative diabetic retinopathy with macular edema, bilateral       |
| DiabetesAny | E13.3319 | Other specified diabetes mellitus with moderate nonproliferative diabetic retinopathy with macular edema, unspecified eye |

|             |          |                                                                                                                                                                      |
|-------------|----------|----------------------------------------------------------------------------------------------------------------------------------------------------------------------|
| DiabetesAny | E13.3391 | Other specified diabetes mellitus with moderate nonproliferative diabetic retinopathy without macular edema, right eye                                               |
| DiabetesAny | E13.3392 | Other specified diabetes mellitus with moderate nonproliferative diabetic retinopathy without macular edema, left eye                                                |
| DiabetesAny | E13.3393 | Other specified diabetes mellitus with moderate nonproliferative diabetic retinopathy without macular edema, bilateral                                               |
| DiabetesAny | E13.3399 | Other specified diabetes mellitus with moderate nonproliferative diabetic retinopathy without macular edema, unspecified eye                                         |
| DiabetesAny | E13.3411 | Other specified diabetes mellitus with severe nonproliferative diabetic retinopathy with macular edema, right eye                                                    |
| DiabetesAny | E13.3412 | Other specified diabetes mellitus with severe nonproliferative diabetic retinopathy with macular edema, left eye                                                     |
| DiabetesAny | E13.3413 | Other specified diabetes mellitus with severe nonproliferative diabetic retinopathy with macular edema, bilateral                                                    |
| DiabetesAny | E13.3419 | Other specified diabetes mellitus with severe nonproliferative diabetic retinopathy with macular edema, unspecified eye                                              |
| DiabetesAny | E13.3491 | Other specified diabetes mellitus with severe nonproliferative diabetic retinopathy without macular edema, right eye                                                 |
| DiabetesAny | E13.3492 | Other specified diabetes mellitus with severe nonproliferative diabetic retinopathy without macular edema, left eye                                                  |
| DiabetesAny | E13.3493 | Other specified diabetes mellitus with severe nonproliferative diabetic retinopathy without macular edema, bilateral                                                 |
| DiabetesAny | E13.3499 | Other specified diabetes mellitus with severe nonproliferative diabetic retinopathy without macular edema, unspecified eye                                           |
| DiabetesAny | E13.3511 | Other specified diabetes mellitus with proliferative diabetic retinopathy with macular edema, right eye                                                              |
| DiabetesAny | E13.3512 | Other specified diabetes mellitus with proliferative diabetic retinopathy with macular edema, left eye                                                               |
| DiabetesAny | E13.3513 | Other specified diabetes mellitus with proliferative diabetic retinopathy with macular edema, bilateral                                                              |
| DiabetesAny | E13.3519 | Other specified diabetes mellitus with proliferative diabetic retinopathy with macular edema, unspecified eye                                                        |
| DiabetesAny | E13.3521 | Other specified diabetes mellitus with proliferative diabetic retinopathy with traction retinal detachment involving the macula, right eye                           |
| DiabetesAny | E13.3522 | Other specified diabetes mellitus with proliferative diabetic retinopathy with traction retinal detachment involving the macula, left eye                            |
| DiabetesAny | E13.3523 | Other specified diabetes mellitus with proliferative diabetic retinopathy with traction retinal detachment involving the macula, bilateral                           |
| DiabetesAny | E13.3529 | Other specified diabetes mellitus with proliferative diabetic retinopathy with traction retinal detachment involving the macula, unspecified eye                     |
| DiabetesAny | E13.3531 | Other specified diabetes mellitus with proliferative diabetic retinopathy with traction retinal detachment not involving the macula, right eye                       |
| DiabetesAny | E13.3532 | Other specified diabetes mellitus with proliferative diabetic retinopathy with traction retinal detachment not involving the macula, left eye                        |
| DiabetesAny | E13.3533 | Other specified diabetes mellitus with proliferative diabetic retinopathy with traction retinal detachment not involving the macula, bilateral                       |
| DiabetesAny | E13.3539 | Other specified diabetes mellitus with proliferative diabetic retinopathy with traction retinal detachment not involving the macula, unspecified eye                 |
| DiabetesAny | E13.3541 | Other specified diabetes mellitus with proliferative diabetic retinopathy with combined traction retinal detachment and rhegmatogenous retinal detachment, right eye |
| DiabetesAny | E13.3542 | Other specified diabetes mellitus with proliferative diabetic retinopathy with combined traction retinal detachment and rhegmatogenous retinal detachment, left eye  |
| DiabetesAny | E13.3543 | Other specified diabetes mellitus with proliferative diabetic retinopathy with combined traction retinal detachment and rhegmatogenous retinal detachment, bilateral |

|             |          |                                                                                                                                                                            |
|-------------|----------|----------------------------------------------------------------------------------------------------------------------------------------------------------------------------|
| DiabetesAny | E13.3549 | Other specified diabetes mellitus with proliferative diabetic retinopathy with combined traction retinal detachment and rhegmatogenous retinal detachment, unspecified eye |
| DiabetesAny | E13.3551 | Other specified diabetes mellitus with stable proliferative diabetic retinopathy, right eye                                                                                |
| DiabetesAny | E13.3552 | Other specified diabetes mellitus with stable proliferative diabetic retinopathy, left eye                                                                                 |
| DiabetesAny | E13.3553 | Other specified diabetes mellitus with stable proliferative diabetic retinopathy, bilateral                                                                                |
| DiabetesAny | E13.3559 | Other specified diabetes mellitus with stable proliferative diabetic retinopathy, unspecified eye                                                                          |
| DiabetesAny | E13.3591 | Other specified diabetes mellitus with proliferative diabetic retinopathy without macular edema, right eye                                                                 |
| DiabetesAny | E13.3592 | Other specified diabetes mellitus with proliferative diabetic retinopathy without macular edema, left eye                                                                  |
| DiabetesAny | E13.3593 | Other specified diabetes mellitus with proliferative diabetic retinopathy without macular edema, bilateral                                                                 |
| DiabetesAny | E13.3599 | Other specified diabetes mellitus with proliferative diabetic retinopathy without macular edema, unspecified eye                                                           |
| DiabetesAny | E13.36   | Other specified diabetes mellitus with diabetic cataract                                                                                                                   |
| DiabetesAny | E13.37X1 | Other specified diabetes mellitus with diabetic macular edema, resolved following treatment, right eye                                                                     |
| DiabetesAny | E13.37X2 | Other specified diabetes mellitus with diabetic macular edema, resolved following treatment, left eye                                                                      |
| DiabetesAny | E13.37X3 | Other specified diabetes mellitus with diabetic macular edema, resolved following treatment, bilateral                                                                     |
| DiabetesAny | E13.37X9 | Other specified diabetes mellitus with diabetic macular edema, resolved following treatment, unspecified eye                                                               |
| DiabetesAny | E13.39   | Other specified diabetes mellitus with other diabetic ophthalmic complication                                                                                              |
| DiabetesAny | E13.40   | Other specified diabetes mellitus with diabetic neuropathy, unspecified                                                                                                    |
| DiabetesAny | E13.41   | Other specified diabetes mellitus with diabetic mononeuropathy                                                                                                             |
| DiabetesAny | E13.42   | Other specified diabetes mellitus with diabetic polyneuropathy                                                                                                             |
| DiabetesAny | E13.43   | Other specified diabetes mellitus with diabetic autonomic (poly)neuropathy                                                                                                 |
| DiabetesAny | E13.44   | Other specified diabetes mellitus with diabetic amyotrophy                                                                                                                 |
| DiabetesAny | E13.49   | Other specified diabetes mellitus with other diabetic neurological complication                                                                                            |
| DiabetesAny | E13.51   | Other specified diabetes mellitus with diabetic peripheral angiopathy without gangrene                                                                                     |
| DiabetesAny | E13.52   | Other specified diabetes mellitus with diabetic peripheral angiopathy with gangrene                                                                                        |
| DiabetesAny | E13.59   | Other specified diabetes mellitus with other circulatory complications                                                                                                     |
| DiabetesAny | E13.610  | Other specified diabetes mellitus with diabetic neuropathic arthropathy                                                                                                    |
| DiabetesAny | E13.618  | Other specified diabetes mellitus with other diabetic arthropathy                                                                                                          |
| DiabetesAny | E13.620  | Other specified diabetes mellitus with diabetic dermatitis                                                                                                                 |
| DiabetesAny | E13.621  | Other specified diabetes mellitus with foot ulcer                                                                                                                          |
| DiabetesAny | E13.622  | Other specified diabetes mellitus with other skin ulcer                                                                                                                    |
| DiabetesAny | E13.628  | Other specified diabetes mellitus with other skin complications                                                                                                            |
| DiabetesAny | E13.630  | Other specified diabetes mellitus with periodontal disease                                                                                                                 |
| DiabetesAny | E13.638  | Other specified diabetes mellitus with other oral complications                                                                                                            |
| DiabetesAny | E13.641  | Other specified diabetes mellitus with hypoglycemia with coma                                                                                                              |
| DiabetesAny | E13.649  | Other specified diabetes mellitus with hypoglycemia without coma                                                                                                           |
| DiabetesAny | E13.65   | Other specified diabetes mellitus with hyperglycemia                                                                                                                       |
| DiabetesAny | E13.69   | Other specified diabetes mellitus with other specified complication                                                                                                        |
| DiabetesAny | E13.8    | Other specified diabetes mellitus with unspecified complications                                                                                                           |
| DiabetesAny | E13.9    | Other specified diabetes mellitus without complications                                                                                                                    |

|             |         |                                                                                    |
|-------------|---------|------------------------------------------------------------------------------------|
| DiabetesAny | E89.1   | Postprocedural hypoinsulinemia                                                     |
| DiabetesAny | O24.011 | Pre-existing type 1 diabetes mellitus, in pregnancy, first trimester               |
| DiabetesAny | O24.012 | Pre-existing type 1 diabetes mellitus, in pregnancy, second trimester              |
| DiabetesAny | O24.013 | Pre-existing type 1 diabetes mellitus, in pregnancy, third trimester               |
| DiabetesAny | O24.019 | Pre-existing type 1 diabetes mellitus, in pregnancy, unspecified trimester         |
| DiabetesAny | O24.02  | Pre-existing type 1 diabetes mellitus, in childbirth                               |
| DiabetesAny | O24.03  | Pre-existing type 1 diabetes mellitus, in the puerperium                           |
| DiabetesAny | O24.111 | Pre-existing type 2 diabetes mellitus, in pregnancy, first trimester               |
| DiabetesAny | O24.112 | Pre-existing type 2 diabetes mellitus, in pregnancy, second trimester              |
| DiabetesAny | O24.113 | Pre-existing type 2 diabetes mellitus, in pregnancy, third trimester               |
| DiabetesAny | O24.119 | Pre-existing type 2 diabetes mellitus, in pregnancy, unspecified trimester         |
| DiabetesAny | O24.12  | Pre-existing type 2 diabetes mellitus, in childbirth                               |
| DiabetesAny | O24.13  | Pre-existing type 2 diabetes mellitus, in the puerperium                           |
| DiabetesAny | O24.311 | Unspecified pre-existing diabetes mellitus in pregnancy, first trimester           |
| DiabetesAny | O24.312 | Unspecified pre-existing diabetes mellitus in pregnancy, second trimester          |
| DiabetesAny | O24.313 | Unspecified pre-existing diabetes mellitus in pregnancy, third trimester           |
| DiabetesAny | O24.319 | Unspecified pre-existing diabetes mellitus in pregnancy, unspecified trimester     |
| DiabetesAny | O24.32  | Unspecified pre-existing diabetes mellitus in childbirth                           |
| DiabetesAny | O24.33  | Unspecified pre-existing diabetes mellitus in the puerperium                       |
| DiabetesAny | O24.410 | Gestational diabetes mellitus in pregnancy, diet controlled                        |
| DiabetesAny | O24.414 | Gestational diabetes mellitus in pregnancy, insulin controlled                     |
| DiabetesAny | O24.415 | Gestational diabetes mellitus in pregnancy, controlled by oral hypoglycemic drugs  |
| DiabetesAny | O24.419 | Gestational diabetes mellitus in pregnancy, unspecified control                    |
| DiabetesAny | O24.420 | Gestational diabetes mellitus in childbirth, diet controlled                       |
| DiabetesAny | O24.424 | Gestational diabetes mellitus in childbirth, insulin controlled                    |
| DiabetesAny | O24.425 | Gestational diabetes mellitus in childbirth, controlled by oral hypoglycemic drugs |
| DiabetesAny | O24.429 | Gestational diabetes mellitus in childbirth, unspecified control                   |
| DiabetesAny | O24.430 | Gestational diabetes mellitus in the puerperium, diet controlled                   |
| DiabetesAny | O24.434 | Gestational diabetes mellitus in the puerperium, insulin controlled                |
| DiabetesAny | O24.435 | Gestational diabetes mellitus in puerperium, controlled by oral hypoglycemic drugs |
| DiabetesAny | O24.439 | Gestational diabetes mellitus in the puerperium, unspecified control               |
| DiabetesAny | O24.811 | Other pre-existing diabetes mellitus in pregnancy, first trimester                 |
| DiabetesAny | O24.812 | Other pre-existing diabetes mellitus in pregnancy, second trimester                |
| DiabetesAny | O24.813 | Other pre-existing diabetes mellitus in pregnancy, third trimester                 |
| DiabetesAny | O24.819 | Other pre-existing diabetes mellitus in pregnancy, unspecified trimester           |
| DiabetesAny | O24.82  | Other pre-existing diabetes mellitus in childbirth                                 |
| DiabetesAny | O24.83  | Other pre-existing diabetes mellitus in the puerperium                             |
| DiabetesAny | O24.911 | Unspecified diabetes mellitus in pregnancy, first trimester                        |
| DiabetesAny | O24.912 | Unspecified diabetes mellitus in pregnancy, second trimester                       |
| DiabetesAny | O24.913 | Unspecified diabetes mellitus in pregnancy, third trimester                        |
| DiabetesAny | O24.919 | Unspecified diabetes mellitus in pregnancy, unspecified trimester                  |
| DiabetesAny | O24.92  | Unspecified diabetes mellitus in childbirth                                        |
| DiabetesAny | O24.93  | Unspecified diabetes mellitus in the puerperium                                    |
| DiabetesAny | O99.810 | Abnormal glucose complicating pregnancy                                            |

|             |         |                                              |
|-------------|---------|----------------------------------------------|
| DiabetesAny | O99.814 | Abnormal glucose complicating childbirth     |
| DiabetesAny | O99.815 | Abnormal glucose complicating the puerperium |

Supplement Table 4. Baseline sociodemographic and clinical characteristics of persons who received a booster dose of mRNA COVID-19 vaccination in the VA healthcare system and their unmatched counterparts who did not receive a booster dose from December 1, 2021 to March 31, 2022.

|                                                                              | <b>Booster mRNA vaccination<br/>N=505,585</b> | <b>No booster vaccination<br/>N=1,181,836</b> |
|------------------------------------------------------------------------------|-----------------------------------------------|-----------------------------------------------|
| <b>Type of booster vaccine</b>                                               |                                               |                                               |
| BNT162b2                                                                     | 37.9                                          | N/A                                           |
| mRNA-1273                                                                    | 62.1                                          | N/A                                           |
| <b>Time since 2<sup>nd</sup> dose COVID-19 mRNA vaccine (days), mean ±SD</b> | 274.0± 36.7                                   | N/A                                           |
| <b>Time since 2<sup>nd</sup> dose COVID-19 mRNA vaccine (%)</b>              |                                               |                                               |
| 5-9 months (154-270 days)                                                    | 48.0                                          | N/A                                           |
| >9 months (> 270 days)                                                       | 52.0                                          | N/A                                           |
| <b>Type of primary COVID-19 mRNA vaccine**</b>                               |                                               |                                               |
| BNT162b2                                                                     | 38.5                                          | 43.5                                          |
| mRNA-1273                                                                    | 61.5                                          | 56.5                                          |
| <b>Sex (%)</b>                                                               |                                               |                                               |
| Female                                                                       | 10.3                                          | 9.5                                           |
| Male                                                                         | 87.3                                          | 87                                            |
| Missing                                                                      | 2.3                                           | 3.5                                           |
| <b>Age (years), mean ±SD</b>                                                 | 63.0±14.0                                     | 62.5±16.3                                     |
| <b>Age Group (%)</b>                                                         |                                               |                                               |
| 18 to 49                                                                     | 17                                            | 22.9                                          |
| 50 to 59                                                                     | 19                                            | 15.4                                          |
| 60 to 64                                                                     | 14.1                                          | 9.7                                           |
| 65 to 69                                                                     | 12.1                                          | 10                                            |
| 70 to 74                                                                     | 19                                            | 18.6                                          |
| 75 to 79                                                                     | 9.7                                           | 10.7                                          |
| 80 to 84                                                                     | 4.4                                           | 5.5                                           |
| 85 to 89                                                                     | 3.2                                           | 4.5                                           |
| ≥90                                                                          | 1.6                                           | 2.5                                           |
| <b>Race (%)</b>                                                              |                                               |                                               |
| White                                                                        | 65.7                                          | 70.8                                          |
| Black                                                                        | 23.6                                          | 17.3                                          |
| Asian                                                                        | 1.7                                           | 1.7                                           |
| American Indian/Alaska Native                                                | 1                                             | 1                                             |
| Pacific Islander/ Native Hawaiian                                            | 1.1                                           | 1                                             |
| Declined/Unknown/Missing                                                     | 6.9                                           | 8.1                                           |
| <b>Ethnicity (%)</b>                                                         |                                               |                                               |
| Non-Hispanic                                                                 | 86.8                                          | 86.8                                          |
| Hispanic                                                                     | 8.7                                           | 7.5                                           |
| Declined/Unknown/Missing                                                     | 4.4                                           | 5.6                                           |



|                                                      |          |          |
|------------------------------------------------------|----------|----------|
| <b>Urban/Rural (%)</b>                               |          |          |
| Rural/Highly rural                                   | 47.3     | 51.7     |
| Urban                                                | 52.7     | 48.3     |
| <b>VA Integrated Service Network (VISN) (%)</b>      |          |          |
| 1                                                    | 4.6      | 4        |
| 2                                                    | 5.4      | 4        |
| 4                                                    | 5        | 4.4      |
| 5                                                    | 2.9      | 3.4      |
| 6                                                    | 6.5      | 6.2      |
| 7                                                    | 6.4      | 7.9      |
| 8                                                    | 10.3     | 9.8      |
| 9                                                    | 3.4      | 3.8      |
| 10                                                   | 7.7      | 6.5      |
| 12                                                   | 5.1      | 3.5      |
| 15                                                   | 3.3      | 3.5      |
| 16                                                   | 6.2      | 6.1      |
| 17                                                   | 5.3      | 7.9      |
| 19                                                   | 3.9      | 4.9      |
| 20                                                   | 4.1      | 6        |
| 21                                                   | 5.8      | 4.9      |
| 22                                                   | 9.3      | 8.6      |
| 23                                                   | 4.9      | 4.7      |
| <b>Body Mass Index (kg/m<sup>2</sup>), mean ±SD</b>  | 30.4±6.1 | 30.1±5.9 |
| <b>Body Mass Index (kg/m<sup>2</sup>), group (%)</b> |          |          |
| <18.5                                                | 0.7      | 0.7      |
| 18.5 to <25                                          | 16.4     | 16.8     |
| 25 to <30 (Overweight)                               | 34.1     | 34.9     |
| 30 to <35 (Obese I)                                  | 27       | 26.1     |
| 35 to <40 (Obese II)                                 | 12.5     | 11.5     |
| ≥40 (Obese III)                                      | 6.7      | 5.8      |
| Missing                                              | 2.4      | 4.3      |
| <b>Charlson Comorbidity Index, mean ± SD</b>         | 1.4±1.8  | 1.1±1.6  |
| <b>Charlson Comorbidity Index group (%)</b>          |          |          |
| 0                                                    | 43.9     | 51.4     |
| 1                                                    | 21.3     | 20.6     |
| 2                                                    | 14.9     | 13.2     |
| 3                                                    | 7.8      | 6.3      |
| 4                                                    | 5.1      | 3.8      |
| 5-6                                                  | 4.7      | 3.3      |
| 7-8                                                  | 1.6      | 1.1      |
| ≥9                                                   | 0.6      | 0.3      |
| <b>Diabetes (%)</b>                                  |          |          |
| No                                                   | 68.8     | 74.2     |
| Yes                                                  | 31.2     | 25.8     |

|                                                        |           |           |
|--------------------------------------------------------|-----------|-----------|
| <b>Chronic Kidney Disease (%)</b>                      |           |           |
| No                                                     | 89.2      | 91.1      |
| Yes                                                    | 10.8      | 8.9       |
| <b>Congestive heart failure (%)</b>                    |           |           |
| No                                                     | 95.1      | 96.6      |
| Yes                                                    | 4.9       | 3.4       |
| <b>Chronic Obstructive Pulmonary Disease (%)</b>       |           |           |
| No                                                     | 86.3      | 89.1      |
| Yes                                                    | 13.7      | 10.9      |
| <b>CAN Score† for mortality w/in 1 year, mean ± SD</b> | 46.8±27.8 | 46.8±28.6 |
| <b>CAN Score† for mortality w/in 1 year group (%)</b>  |           |           |
| 0-30                                                   | 33        | 34.4      |
| 31-55                                                  | 28.4      | 24.8      |
| 56-75                                                  | 20        | 20        |
| 76-90                                                  | 13.2      | 14.3      |
| 95-96                                                  | 1.7       | 1.7       |
| 97-98                                                  | 1.6       | 1.6       |
| 99                                                     | 0.7       | 0.6       |
| Missing                                                | 1.4       | 2.6       |
| <b>Immunosuppressant medications* (%)</b>              |           |           |
| No                                                     | 94.1      | 95.9      |
| Yes                                                    | 5.9       | 4.1       |

† **CAN score** is the Care Assessment Needs score a validated measure of 1-year mortality in VA enrollees, presented as a percentile of all VA enrollees

\* Immunosuppressant medications prescribed in the previous year (see list of immunosuppressant medications in **Supplement Table 2**)

Supplement Table 5. Baseline sociodemographic and clinical characteristics of persons who received a booster dose of mRNA COVID-19 vaccination in the VA healthcare system and their matched counterparts who did not receive a booster dose from December 1, 2021 to March 31, 2022, and for whom all members of matched sets were still at risk 10 days after time zero.

|                                                                                             | <b>Booster mRNA vaccination<br/>N=468,616</b> | <b>No booster vaccination<br/>N=468,616</b> | <b>Standardized Mean Difference</b> |
|---------------------------------------------------------------------------------------------|-----------------------------------------------|---------------------------------------------|-------------------------------------|
| <b>Type of 3<sup>rd</sup> dose COVID-19 mRNA vaccine</b>                                    |                                               |                                             |                                     |
| BNT162b2                                                                                    | 37.7                                          | N/A                                         | 0.0000                              |
| mRNA-1273                                                                                   | 62.3                                          | N/A                                         | 0.0000                              |
| <b>Time since 2<sup>nd</sup> dose COVID-19 mRNA vaccine (days), mean <math>\pm</math>SD</b> | 273.3 $\pm$ 35.8                              | 273.4 $\pm$ 36.8                            | -0.0028                             |
| <b>Time since 2<sup>nd</sup> dose COVID-19 mRNA vaccine (%)</b>                             |                                               |                                             |                                     |
| 5-9 months (154-270 days)                                                                   | 51.5                                          | 51.8                                        | -0.0060                             |
| >9 months (> 270 days)                                                                      | 48.5                                          | 48.2                                        | 0.0060                              |
| <b>Type of primary COVID-19 mRNA vaccine**</b>                                              |                                               |                                             |                                     |
| BNT162b2                                                                                    | 38.3                                          | 38.3                                        | 0.0000                              |
| mRNA-1273                                                                                   | 61.7                                          | 61.7                                        | 0.0000                              |
| <b>Sex (%)</b>                                                                              |                                               |                                             |                                     |
| Female                                                                                      | 10.2                                          | 9.9                                         | 0.0100                              |
| Male                                                                                        | 87.4                                          | 87.7                                        | -0.0091                             |
| Declined/Unknown/Missing                                                                    | 2.4                                           | 2.4                                         | 0.0000                              |
| <b>Age (years), mean <math>\pm</math>SD</b>                                                 | 63.0 $\pm$ 14.0                               | 63.0 $\pm$ 14.0                             | 0.0000                              |
| <b>Age Group (%)</b>                                                                        |                                               |                                             |                                     |
| 18 to 49                                                                                    | 17                                            | 17                                          | 0.0000                              |
| 50 to 59                                                                                    | 18.9                                          | 18.9                                        | 0.0000                              |
| 60 to 64                                                                                    | 14                                            | 13.7                                        | 0.0087                              |
| 65 to 69                                                                                    | 12.2                                          | 12                                          | 0.0061                              |
| 70 to 74                                                                                    | 19.1                                          | 19.7                                        | -0.0152                             |
| 75 to 79                                                                                    | 9.8                                           | 9.6                                         | 0.0068                              |
| 80 to 84                                                                                    | 4.4                                           | 4.4                                         | 0.0000                              |
| 85 to 89                                                                                    | 3.2                                           | 3.1                                         | 0.0057                              |
| $\geq$ 90                                                                                   | 1.5                                           | 1.5                                         | 0.0000                              |
| <b>Race (%)</b>                                                                             |                                               |                                             |                                     |
| White                                                                                       | 66.4                                          | 67.1                                        | -0.0149                             |
| Black                                                                                       | 22.8                                          | 22.2                                        | 0.0144                              |
| Asian                                                                                       | 1.7                                           | 1.7                                         | 0.0000                              |
| American Indian/Alaska Native                                                               | 1                                             | 1                                           | 0.0000                              |
| Pacific Islander/ Native Hawaiian                                                           | 1.1                                           | 1.1                                         | 0.0000                              |
| Declined/Unknown/Missing                                                                    | 6.9                                           | 6.8                                         | 0.0040                              |

|                                                      |          |          |         |
|------------------------------------------------------|----------|----------|---------|
| <b>Ethnicity (%)</b>                                 |          |          |         |
| Non-Hispanic                                         | 86.9     | 87.3     | -0.0119 |
| Hispanic                                             | 8.6      | 8.2      | 0.0144  |
| Declined/Unknown/Missing                             | 4.5      | 4.5      | 0.0000  |
| <b>Urban/Rural (%)</b>                               |          |          |         |
| Rural/Highly rural                                   | 47.9     | 48.2     | -0.0060 |
| Urban                                                | 52.1     | 51.8     | 0.0060  |
| <b>VA Integrated Service Network (VISN) (%)</b>      |          |          |         |
| 1                                                    | 4.5      | 4.5      | 0.0000  |
| 2                                                    | 5.3      | 5.3      | 0.0000  |
| 4                                                    | 5        | 5        | 0.0000  |
| 5                                                    | 2.8      | 2.8      | 0.0000  |
| 6                                                    | 6.5      | 6.5      | 0.0000  |
| 7                                                    | 6.5      | 6.5      | 0.0000  |
| 8                                                    | 10.4     | 10.4     | 0.0000  |
| 9                                                    | 3.4      | 3.4      | 0.0000  |
| 10                                                   | 7.7      | 7.7      | 0.0000  |
| 12                                                   | 5        | 5        | 0.0000  |
| 15                                                   | 3.2      | 3.2      | 0.0000  |
| 16                                                   | 6.2      | 6.2      | 0.0000  |
| 17                                                   | 5.4      | 5.4      | 0.0000  |
| 19                                                   | 3.9      | 3.9      | 0.0000  |
| 20                                                   | 4.1      | 4.1      | 0.0000  |
| 21                                                   | 5.8      | 5.8      | 0.0000  |
| 22                                                   | 9.3      | 9.3      | 0.0000  |
| 23                                                   | 5        | 5        |         |
| <b>Body Mass Index (kg/m<sup>2</sup>), mean ±SD</b>  | 30.4±6.1 | 30.4±6.1 | 0.0000  |
| <b>Body Mass Index (kg/m<sup>2</sup>), group (%)</b> |          |          |         |
| <18.5                                                | 0.7      | 0.7      | 0.0000  |
| 18.5 to <25                                          | 16.5     | 15.8     | 0.0190  |
| 25 to <30 (Overweight)                               | 34.2     | 33.9     | 0.0063  |
| 30 to <35 (Obese I)                                  | 27       | 27       | 0.0000  |
| 35 to <40 (Obese II)                                 | 12.5     | 12.6     | -0.0030 |
| ≥40 (Obese III)                                      | 6.6      | 6.7      | -0.0040 |
| Missing                                              | 2.5      | 3.3      | -0.0477 |
| <b>Charlson Comorbidity Index, mean ± SD</b>         | 1.3±1.7  | 1.3±1.7  | 0.0000  |
| <b>Charlson Comorbidity Index group (%)</b>          |          |          |         |
| 0                                                    | 44.7     | 44.7     | 0.0000  |
| 1                                                    | 21.5     | 22       | -0.0121 |
| 2                                                    | 15.1     | 14.8     | 0.0084  |
| 3                                                    | 7.8      | 7.6      | 0.0075  |
| 4                                                    | 4.9      | 4.9      | 0.0000  |
| 5-6                                                  | 4.4      | 4.4      | 0.0000  |
| 7-8                                                  | 1.3      | 1.3      | 0.0000  |

|                                                        |           |           |         |
|--------------------------------------------------------|-----------|-----------|---------|
| ≥9                                                     | 0.3       | 0.3       | 0.0000  |
| <b>Diabetes (%)</b>                                    | 30.6      | 31.2      | -0.0130 |
| <b>Chronic Kidney Disease (%)</b>                      | 10.2      | 10        | 0.0066  |
| <b>Congestive heart failure (%)</b>                    | 4.5       | 4.3       | 0.0098  |
| <b>Chronic Obstructive Pulmonary Disease (%)</b>       | 13.2      | 13.5      | -0.0088 |
| <b>CAN Score† for mortality w/in 1 year, mean ± SD</b> | 46.7±27.6 | 46.6±27.4 | 0.0036  |
| <b>CAN Score† for mortality w/in 1 year group (%)</b>  |           |           |         |
| 0-30                                                   | 33        | 32.9      | 0.0021  |
| 31-55                                                  | 28.6      | 28.4      | 0.0044  |
| 56-75                                                  | 20.2      | 20.2      | 0.0000  |
| 76-90                                                  | 13.1      | 12.9      | 0.0059  |
| 95-96                                                  | 1.6       | 1.5       | 0.0081  |
| 97-98                                                  | 1.5       | 1.4       | 0.0084  |
| 99                                                     | 0.6       | 0.5       | 0.0135  |
| Missing                                                | 1.4       | 2.1       | -0.0534 |
| <b>Immunosuppressant medications* (%)</b>              | 5.3       | 5.2       | 0.0045  |

**Supplement Figure 1. Schematic representation of the method used to match person(s) who did not receive a booster mRNA vaccine to each person who received a booster mRNA vaccine, within each 1-week period during the target trial period.**

**Supplement Figure 1 Caption.**

The schematic shows a specific person during the 1-week period from 01/3/2022 to 01/9/2022 who received a booster mRNA vaccine dose on 01/8/2022 and met all of the target trial’s eligibility criteria and did not have SARS-CoV-2 infection as of 01/8/2022. This person is matched to a person who did not receive a booster vaccine dose as of 01/8/2022 (i.e. had only received two mRNA doses), who also fulfilled all the eligibility criteria and was alive as of 01/8/2022, and had the same VISN, type of primary vaccination, week of primary vaccination completion (within 6 weeks), age (within 6 years) and Charlson Comorbidity Index (CCI, within 3 points) as the booster dose recipient, and has a propensity score within 0.2 standard deviation of the mean (sdm) of that of the booster dose recipient. In practice, the propensity score difference between matched sets ranged from 0.0002-0.0033 sdm. Both persons in the matched pair have to remain at risk (i.e. alive, uninfected) as of the date 10 days later, after which outcomes are ascertained for the calculation of vaccine effectiveness

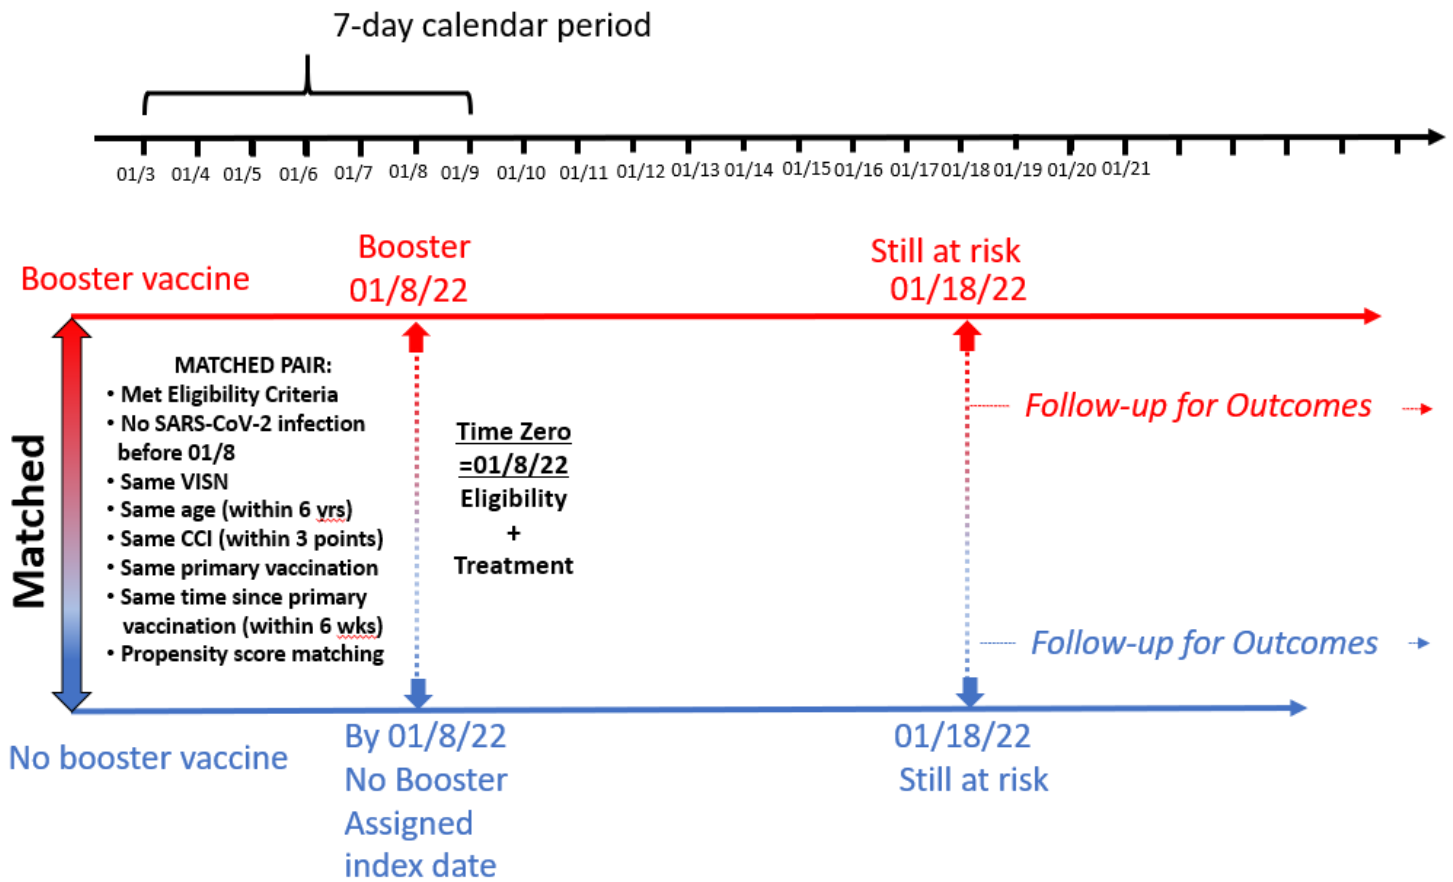

**Supplement Figure 2. Eligibility criteria and matching process resulting in the selection of study populations for the emulation of a target trial comparing the effectiveness of booster mRNA COVID-19 vaccination versus no booster in the national Veterans Affairs (VA) healthcare system from December 1, 2021 to March 31, 2022**

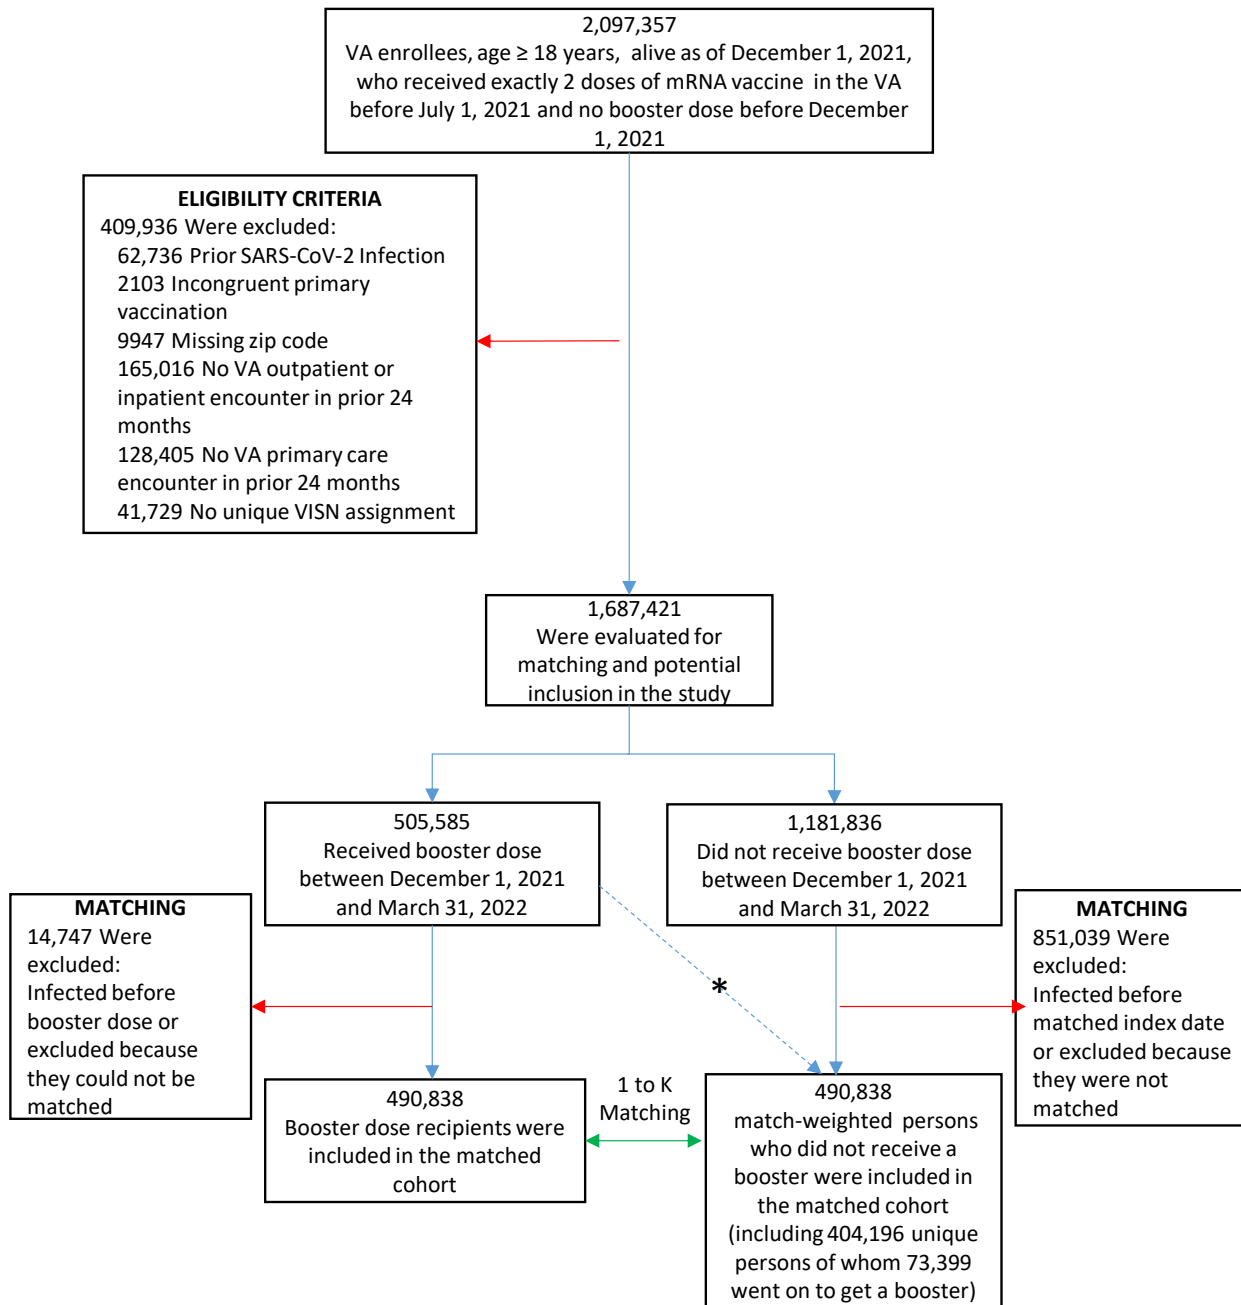

**Supplement Figure 3. Comparison of baseline characteristics of persons who received a 3<sup>rd</sup> dose mRNA COVID-19 vaccine and their comparators who did not, before and after matching, demonstrate excellent balance after matching**

- a. Absolute standardized mean difference and variance ratio of baseline characteristics between 3<sup>rd</sup> dose mRNA vaccination recipients versus no third dose received shown for the raw (green dots) and matched (orange dots) data demonstrate balance after matching.

Prior to matching, the absolute standardized difference in baseline characteristics between the 3<sup>rd</sup> dose and no 3<sup>rd</sup> dose groups ranged from 0.003-0.162 with a median of 0.060 (IQR: 0.040-0.089). After matching, the absolute standardized differences ranged from 0.000-0.016 with a median of 0.001 (IQR: 0.002-0.011).

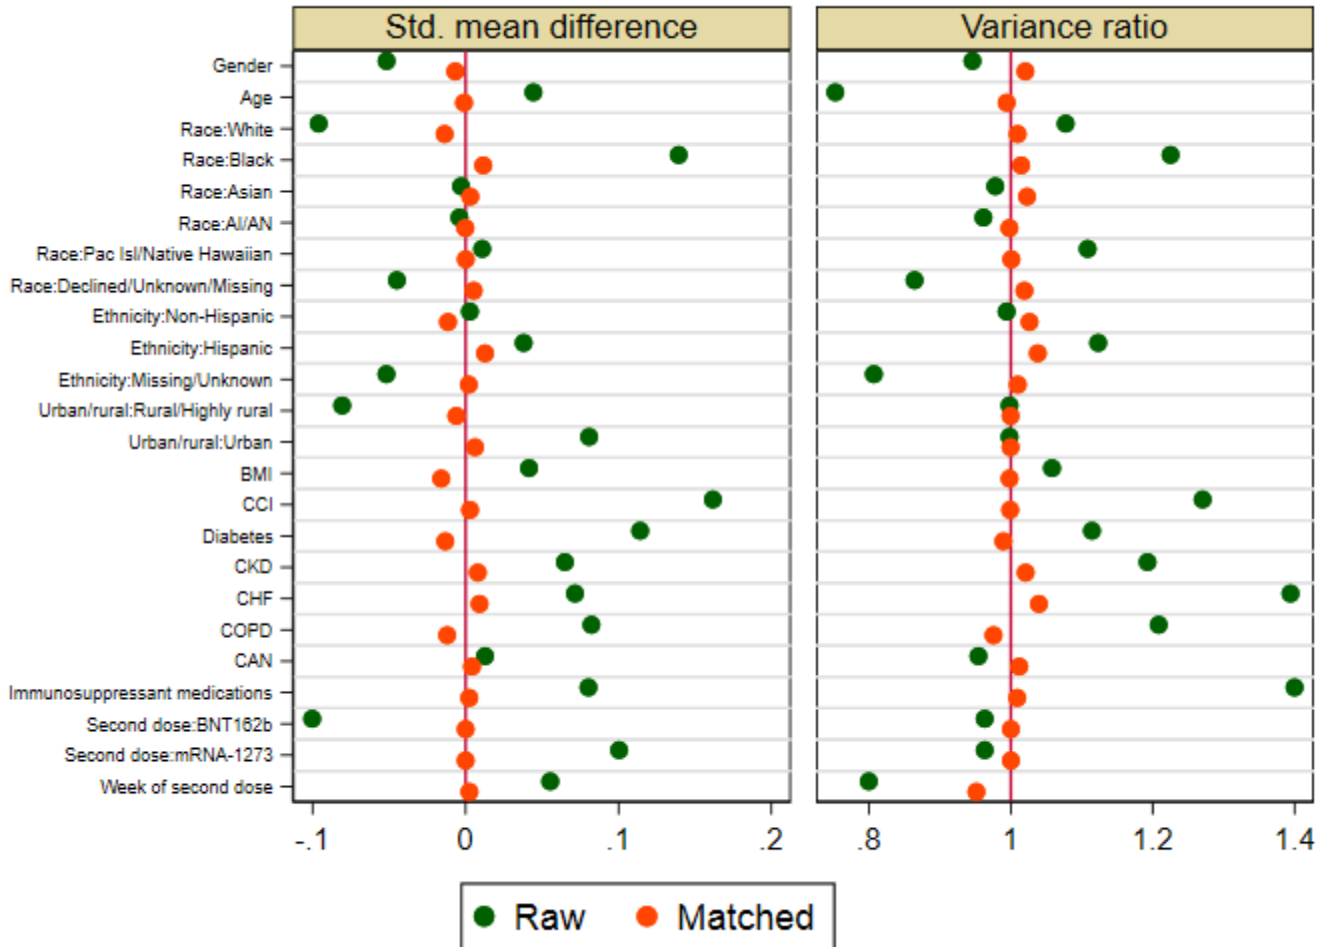



- b. Cumulative distribution of propensity score between 3<sup>rd</sup> dose mRNA vaccination recipients versus no third dose received shown for the raw and matched data demonstrate balance after matching.

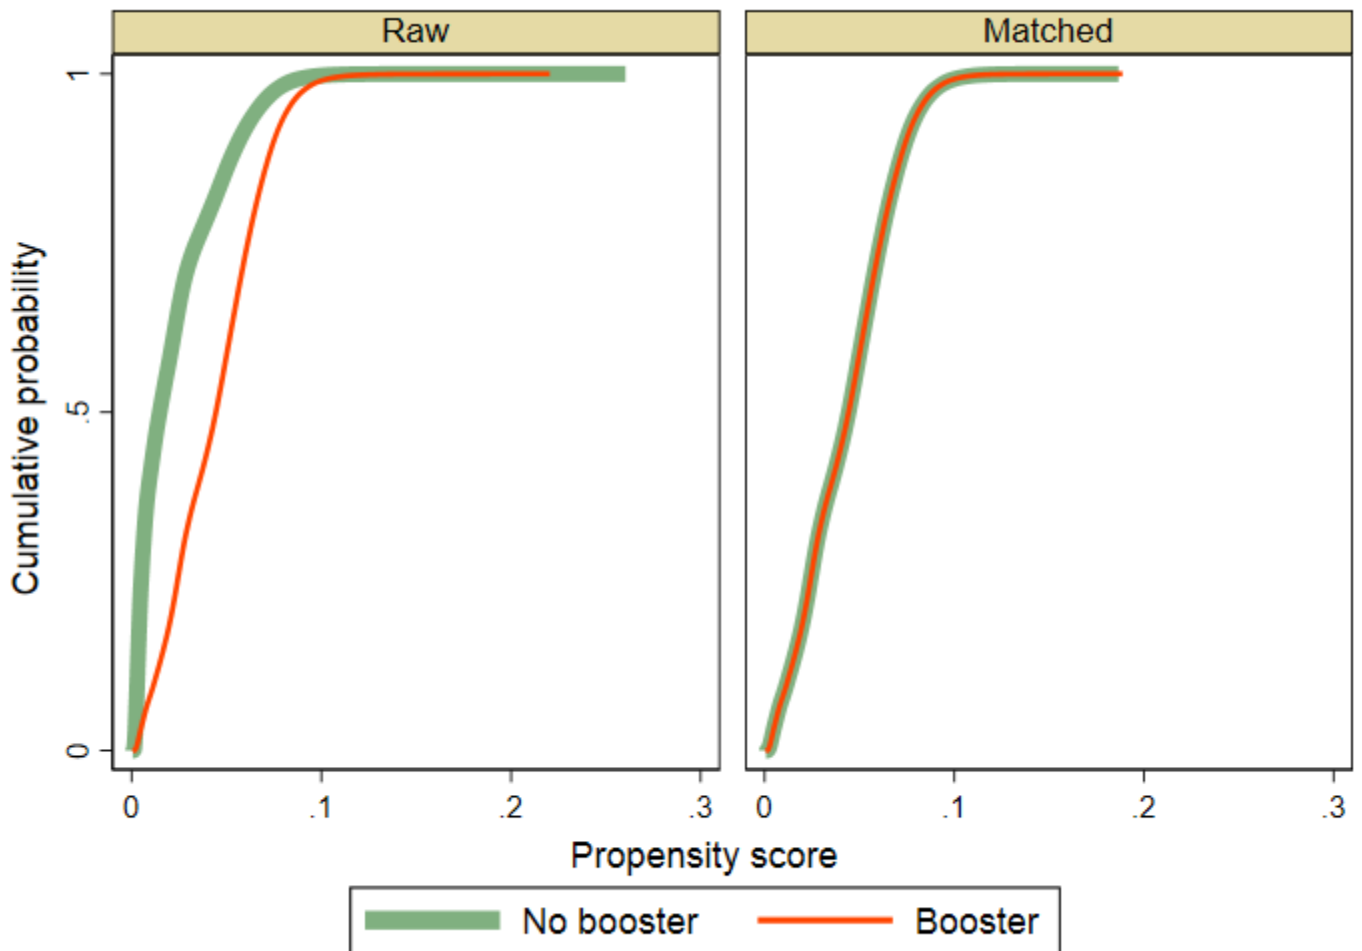

Supplement: aim-olf-M221856-M22-1856_Supplement.pdf [file aim-olf-M221856-M22-1856_Supplement.pdf]
